# Supplementary material for: Magnetic coupling between Fe(NO) spin probe ligands through diamagnetic NiII, PdII and PtII tetrathiolate bridges
Source: Royal Society of Chemistry journal article supplement (doi:10.1039/d3sc01546g), 2023-01-01
Supplement: d3sc01546g1.pdf [file d3sc01546g1.pdf]

**Supporting Information for**

**Magnetic Coupling between Fe(NO) Spin Probe Ligands  
Through Diamagnetic Ni<sup>II</sup>, Pd<sup>II</sup> and Pt<sup>II</sup> Tetrathiolate Bridges**

Manuel Quiroz,<sup>a</sup> Molly M. Lockart,<sup>b</sup> Shan Xue,<sup>c</sup> Dakota Jones,<sup>a</sup> Yisong Guo,<sup>c</sup> Brad S. Pierce,<sup>d</sup> Kim R. Dunbar,<sup>a\*</sup> Michael B. Hall,<sup>a\*</sup> and Marcetta Y. Darensbourg<sup>a\*</sup>

<sup>a</sup>Department of Chemistry, Texas A & M University, College Station, Texas 77843, United States

<sup>b</sup>Department of Chemistry & Biochemistry, Samford University, Birmingham, Alabama 35229, United States

<sup>c</sup>Department of Chemistry, Carnegie Mellon University, Pittsburgh, Pennsylvania 15213, United States

<sup>d</sup>Department of Chemistry & Biochemistry, University of Alabama, Tuscaloosa, Alabama 35487, United States

**Table of Contents**

|                                                                                     |               |
|-------------------------------------------------------------------------------------|---------------|
| Materials and Methods.....                                                          | <b>S2-7</b>   |
| Infrared and UV-Vis spectroscopy.....                                               | <b>S8</b>     |
| Positive-ion ESI-MS data with isotopic bundles.....                                 | <b>S9</b>     |
| Zero field <sup>57</sup> Fe Mössbauer spectroscopy with simulation parameters.....  | <b>S10</b>    |
| Electrochemical data from cyclic voltammograms over multiple scan rates.....        | <b>S11-12</b> |
| SQUID magnetometry data with fits ( $\chi_M$ vs. T and $1/\chi_M$ vs. T plots)..... | <b>S12</b>    |
| Crystallographic refinement details.....                                            | <b>S13</b>    |
| X-ray crystal structures and packing diagrams.....                                  | <b>S14-16</b> |
| Selected bond length and angles from x-ray crystal structures.....                  | <b>S17-20</b> |
| Frontier orbital energy diagrams.....                                               | <b>S21</b>    |
| Frontier orbital contour plots.....                                                 | <b>S22</b>    |
| Spin Density plots.....                                                             | <b>S23</b>    |
| Comparison of the transoid and cisoid optimized structures.....                     | <b>S24</b>    |
| Computational Coordinates (optimized BS singlet).....                               | <b>S25-27</b> |
| References .....                                                                    | <b>S28</b>    |

## Materials and Methods

**General Considerations.** All reactions were performed in a N<sub>2</sub> atmosphere glovebox or by using standard Schlenk line technique. All solvents were purified with an MBraun Manual Solvent Purification System with AcloaF200 activated alumina dessicant. All reagents were purchased from Sigma Aldrich, TCI, and BTC, and used as received. The starting material N,N-bis(2-mercaptoethyl)-1,4-diazacycloheptane (bme-dach), (NO)Fe(bme-dach), was synthesized according to published procedures.<sup>1</sup> The [Pt(CH<sub>3</sub>CN)<sub>4</sub>][BF<sub>4</sub>] precursor was prepared from a modified procedure which involves the protonation of Pt(acac)<sub>2</sub> with excess HBF<sub>4</sub>•Et<sub>2</sub>O (20 equivalents) in CH<sub>3</sub>CN. The [n-Bu<sub>4</sub>N][PF<sub>6</sub>] and AgNO<sub>3</sub> salts were reagent grade and used as purchased from Sigma Aldrich.

A Bruker Tensor Fourier Transform IR (FTIR) spectrometer was used to acquire infrared spectra with a CaF<sub>2</sub> cell. Electronic absorption spectra were obtained using a Shimadzu UV-1601PC spectrophotometer. The Laboratory for Biological Mass Spectrometry at Texas A&M Univeristy was used to collect mass spectrometry (ESI-MS) data. Elemental analyses were performed at Atlantic Microlab Inc. in Norcross, Ga. Zero-field <sup>57</sup>Fe Mössbauer spectra were collected on a SEE Co. Mössbauer spectrometer (MS4) with a <sup>57</sup>Co/Rh radiation source and the spectra were fitted with the WMOSS software (both from SEE co.).

**Synthesis of [(NO)Fe(bme-dach)-Pd<sup>II</sup>-(bme-dach)Fe(NO)][BF<sub>4</sub>]<sub>2</sub>, [FePdFe][BF<sub>4</sub>]<sub>2</sub>.** In a small vial, 36 mg (0.082 mmol) of [Pd(CH<sub>3</sub>CN)<sub>4</sub>][BF<sub>4</sub>]<sub>2</sub> was dissolved in approximately 5 mL of CH<sub>3</sub>CN. In a large vial, 50 mg (0.164 mmol) of (NO)Fe(bme-dach) was dissolved in approximately 10 mL of CH<sub>3</sub>CN and the solution of [Pd(CH<sub>3</sub>CN)<sub>4</sub>][BF<sub>4</sub>]<sub>2</sub> was added dropwise and stirred for 45 mins. The color of the solution gradually changed from dark green to yellow-green as the reaction approached completion. The solution was concentrated and excess Et<sub>2</sub>O was added to precipitate the product. The solid product was redissolved in CH<sub>3</sub>CN and filtered through Celite. Dark green

crystals of the product were grown using vapor diffusion of Et<sub>2</sub>O into a solution of CH<sub>3</sub>CN at room temperature to yield 65 mg of product (~ 90 % yield). FTIR (CaF<sub>2</sub> windows, CH<sub>3</sub>CN, 23 °C):  $\nu(\text{NO}) = 1734 \text{ cm}^{-1}$  (s). UV-vis absorption spectrum [CH<sub>3</sub>CN,  $\lambda_{\text{max}}$ , nm ( $\epsilon_{\text{M}}$ , M<sup>-1</sup> cm<sup>-1</sup>): 387 (9070), 413 (9440), 600 (600). Cyclic voltammetry in CH<sub>3</sub>CN: **[FePdFe]<sup>2+</sup>** + e<sup>-</sup> → **[FePdFe]<sup>+</sup>** (-0.76 V), **[FePdFe]<sup>+</sup>** + e<sup>-</sup> → **[FePdFe]<sup>0</sup>** (-1.01 V). ESI-MS positive mode: [M]<sup>2+</sup> = 356.97 m/z. Anal. Calcd for H<sub>42</sub>C<sub>22</sub>O<sub>2</sub>N<sub>8</sub>S<sub>4</sub>Fe<sub>2</sub>B<sub>2</sub>F<sub>8</sub>Pd: H, 4.36; C, 27.22; N, 11.55; S, 13.21. Found: H, 4.44; C, 26.62; N, 10.68; S, 13.55.

**Synthesis of [(NO)Fe(bme-dach)-Ni<sup>II</sup>-(bme-dach)Fe(NO)][BF<sub>4</sub>]<sub>2</sub>, [FeNiFe][BF<sub>4</sub>]<sub>2</sub>.** This nickel analogue was prepared in a similar manner as described above for **[FePdFe][BF<sub>4</sub>]<sub>2</sub>** except **[Ni(CH<sub>3</sub>CN)<sub>4</sub>][BF<sub>4</sub>]<sub>2</sub>** was generated *in situ* by dissolving 28 mg (0.082 mmol) of Ni(BF<sub>4</sub>)•6H<sub>2</sub>O in CH<sub>3</sub>CN and stirring for 30 mins before addition to (NO)Fe(bme-dach) (50 mg, 0.164 mmol). Dark yellow crystals of the product were grown using vapor diffusion of Et<sub>2</sub>O into a solution of CH<sub>3</sub>CN at room temperature to yield 60 mg of product (~ 88 % yield). FTIR (CaF<sub>2</sub> windows, CH<sub>3</sub>CN, 23 °C):  $\nu(\text{NO}) = 1734 \text{ cm}^{-1}$  (s). UV-vis absorption spectrum [CH<sub>3</sub>CN,  $\lambda_{\text{max}}$ , nm ( $\epsilon_{\text{M}}$ , M<sup>-1</sup> cm<sup>-1</sup>): 415 (8420), 625 (595). Cyclic voltammetry (E<sub>1/2</sub>): **[FeNiFe]<sup>2+</sup>** + e<sup>-</sup> → **[FeNiFe]<sup>+</sup>** (-0.85 V), **[FeNiFe]<sup>+</sup>** + e<sup>-</sup> → **[FeNiFe]<sup>0</sup>** (-1.06 V). ESI-MS positive mode: [M]<sup>2+</sup> = 332.99 m/z. Anal. Calcd for H<sub>42</sub>C<sub>22</sub>O<sub>2</sub>N<sub>8</sub>S<sub>4</sub>Fe<sub>2</sub>B<sub>2</sub>F<sub>8</sub>Ni: H, 4.59; C, 28.63; N, 12.14; S, 13.90. Found: H, 4.62; C, 28.46; N, 11.26; S, 13.95.

**Synthesis of [(NO)Fe(bme-dach)-Pt<sup>II</sup>-(bme-dach)Fe(NO)][BF<sub>4</sub>]<sub>2</sub>, [FePtFe][BF<sub>4</sub>]<sub>2</sub>.** This platinum analogue was prepared in a similar manner as described above for **[FePdFe][BF<sub>4</sub>]<sub>2</sub>** using 28 mg (0.056 mmol) of freshly prepared **[Pt(CH<sub>3</sub>CN)<sub>4</sub>][BF<sub>4</sub>]<sub>2</sub>** and 34 mg (0.114 mmol) of (NO)Fe(bme-dach). Brown crystals of the product were grown using vapor diffusion of Et<sub>2</sub>O into a solution of CH<sub>3</sub>CN at room temperature to yield 33 mg of product (~ 60 % yield). FTIR (CaF<sub>2</sub> windows, CH<sub>3</sub>CN, 23 °C):  $\nu(\text{NO}) = 1734 \text{ cm}^{-1}$  (s). UV-vis absorption spectrum [CH<sub>3</sub>CN,  $\lambda_{\text{max}}$ , nm

( $\epsilon_M, M^{-1} \text{ cm}^{-1}$ ): 417 (5800), 617 (545), 750 (325). Cyclic voltammetry ( $E_{1/2}$ ):  $[\text{FePtFe}]^{2+} + e^- \rightarrow [\text{FePtFe}]^+ (-0.76 \text{ V})$ ,  $[\text{FePtFe}]^+ + e^- \rightarrow [\text{FePtFe}]^0 (-0.97 \text{ V})$ . ESI-MS positive mode:  $[\text{M}]^{2+} = 401.50 \text{ m/z}$ . Anal. Calcd for  $\text{H}_{36}\text{C}_{18}\text{O}_2\text{N}_6\text{S}_4\text{Fe}_2\text{B}_2\text{F}_8\text{Pt}$ : H, 3.71; C, 22.13; N, 8.60; S, 13.12. Found: H, 3.93; C, 22.87; N, 8.39; S, 12.90.

**X-ray crystallography.** The crystal structures of  $[\text{FeMFe}][\text{BF}_4]_2$  (M = Ni: CCDC # 2231567, M = Pd: 2231568, M = Pt: 2231569) were measured at 110 K on a Bruker Quest X-ray (fixed-Chi geometry) diffractometer with a Mo-I $\mu$ s X-ray tube ( $K_\alpha = 0.71073 \text{ \AA}$ ). Integrated intensity information for each reflection was obtained by reduction of the data frames with the program APEX4,<sup>2</sup> including the two domains. The integration method employed a three-dimensional profiling algorithm and all data were corrected for Lorentz and polarization factors, as well as for crystal decay effects. Finally, the data for each of the three  $[\text{FeMFe}][\text{BF}_4]$  structures were merged and scaled to produce a suitable data set. The absorption correction program TWINABS<sup>3</sup> was employed to correct the data for absorption effects, as well as to separate files: twin4.hkl, containing non-overlapping reflections, and twin5.hkl, containing reflections only from the major component. While the former was used for structure solution, the latter was used for final least squares refinement. Using Olex2,<sup>4</sup> the structures of  $[\text{FeMFe}][\text{BF}_4]_2$  were solved with the SHELXT<sup>5</sup> structure solution program using Intrinsic Phasing and refined with the SHELXL<sup>6</sup> refinement package using Least Squares minimization. The structures of  $[\text{FeMFe}]^{2+}$  were solved and refined with two half molecules in the  $P\bar{1}$  space group with  $Z = 2$ , and  $Z' = 2 \times 0.5$  which results in two independent structures with similar metrical parameters. Hydrogen atoms were placed on their parent atoms and set to idealized positions. All non-hydrogen atoms were refined with anisotropic thermal patterns. Absence of additional symmetry was confirmed by PLATON.<sup>7</sup>

**Electrochemistry.** A CHI600E electrochemical analyser from CH Instruments Inc. was used to acquire cyclic voltammetry data. An air-tight, three-electrode cell was used during measurements

which were carried out at room temperature under anaerobic conditions with CH<sub>3</sub>CN as the solvent. A concentration of 0.1 M [<sup>1</sup>Bu<sub>4</sub>N][PF<sub>6</sub>] was used for the electrolyte, and the concentration of the analyte was 1.0 mM. The working electrode was a 0.071 cm<sup>2</sup> glassy carbon disk, the reference electrode was a Ag/AgNO<sub>3</sub> CH<sub>3</sub>CN solution in a Vycor-tipped glass tube, and the counter electrode was a platinum wire. All potentials were referenced to the Fc/Fc<sup>+</sup> couple at 0.00 V. Care was taken to ensure that the analyte was not exposed to O<sub>2</sub> during the experiment, and an alumina-water slurry was used to polish the electrode as needed.

**Magnetic Measurements.** DC magnetic measurements were performed on freshly prepared, crushed crystalline samples of [FeMFe]<sup>2+</sup>. The sample was placed in a eicosane matrix inside and NMR tube (high quality) and measured at a temperature range from 2-300 K in an applied magnetic field of 10000 Oe on a Quantum Design SQUID, Model MPMS with a 7 Tesla magnet. To restrain the crystals, the eicosane was heated (40 °C) and homogenously dispersed throughout the sample. The NMR tube was then vacuumed sealed with a butane torch. The diamagnetic contribution from the eicosane was subtracted from the raw data. The molar paramagnetic susceptibilities ( $\chi_{MT}$ ) were obtained by using Pascal's constants to subtract the diamagnetic corrections of the atoms from the experimental susceptibilities.<sup>8</sup> A paramagnetic (S = 1/2) impurity of 2% contribution was added to the fits of [FeNiFe]<sup>2+</sup> and [FePdFe]<sup>2+</sup>. Magnetic (SQUID) data was fitted using the PHI® software.<sup>9</sup>

**CW-EPR Measurement.** A Bruker (Billerica, MA) ELEXSYS E540 X-band spectrometer was used to measure continuous wave (CW) EPR of [FePdFe]<sup>2+</sup> as a frozen solution (1:1 DCM/CH<sub>3</sub>CN). The spectrometer was equipped with an ER 4116 dual mode resonator, an Oxford ESR900 cryostat, and Oxford ITC 04 temperature controller. EPR spectra were collected with microwave field polarizations (**B**<sub>1</sub>) both perpendicular and parallel to the applied magnetic field (**B**<sub>0</sub>) with a nominal microwave frequency of 9.65 GHz and 9.41 GHz, respectively. All spectra

were collected under non-saturating conditions with a modulating frequency of 100 kHz and a modulating amplitude of 0.9 mT. Temperature dependent measurements were obtained from 6 - 65 K using liquid helium. Simulations of EPR data were performed using the custom software package, Spincount (version 7.0.8087.17737), developed by Professor Michael Hendrich at Carnegie Mellon University.<sup>10</sup> Simulations are calculated from the general spin Hamiltonian shown in **Eqn (S1)**,

$$\hat{H} = D(\hat{S}_z^2 - S(S + 1)/3) + E(\hat{S}_x^2 - \hat{S}_y^2) + g\mu_B\vec{B} \cdot \hat{S} \quad \text{Eqn (S1)}$$

where  $D$  and  $E$  are the axial and rhombic zero-field splitting (zfs) parameters and  $g$  is the g-tensor.<sup>11</sup>

Simulations were generated with consideration of all intensity factors, both theoretical and experimental, to allow for determination of species concentration. The only unknown factor relating the spin concentration to signal intensity was an instrumental factor that is specific to the microwave detection system. This factor was determined by a Cu(EDTA) spin standard prepared from a copper atomic absorption standard solution purchased from Sigma-Aldrich.

The energy between the ground state and the excited state ( $|0\rangle$ ,  $|\pm 1\rangle$ ) was obtained by fitting the temperature-normalized signal intensity data ( $S \times T$ ) to a Boltzmann population distribution for a 2-level system, **Eqn (S2)**:

$$\text{Intensity} \times T = \frac{g_i \cdot e^{-\Delta E_i/k_b T}}{\sum_j g_j \cdot e^{-\Delta E_j/k_b T}} \quad \text{Eqn (S2)}$$

All simulations were calculated with consideration of all theoretical and experimental intensity factors in order to determine species concentration. An instrumental factor specific to the microwave detection system was the only unknown factor relating the spin concentration to the signal intensity. A standardized EPR sample of 1.00 mM [Cu<sup>2+</sup>(EDTA)], prepared from a

calibrated Cu atomic absorption standard (Sigma Aldrich), was used to determine this instrumental factor.

## **Computational Methodology**

Density functional theory (DFT) calculations were performed in Gaussian 16 Revision B.010<sup>12</sup> with the TPSS/TPSS<sup>13</sup> functional. Triple- $\zeta$  basis set 6-311++G(d,p) was used for non-metals<sup>14-16</sup> and the Wachters-Hay basis set under the designation 6-311++G(d,p)<sup>17-19</sup> and the correlation consistent basis set cc-pVTZ<sup>20</sup> for iron and nickel, respectively. For palladium and platinum an Effective Core Potential (ECP) and a triple- $\zeta$  quality basis set (cc-pVTZ-PP) was used for core and valence electrons, respectively.<sup>21,22</sup> The crystal structures of  $[\text{FeMFe}]^{2+}$  were imported to use as the starting coordinates for gas phase optimization and frequency calculations using GaussView 6.0.16.<sup>23</sup> All species were confirmed to be minimum energy structures by the absence of imaginary frequencies. Lower-spin BS solutions were converged by repopulation of the converged orbitals from the high-spin solutions.

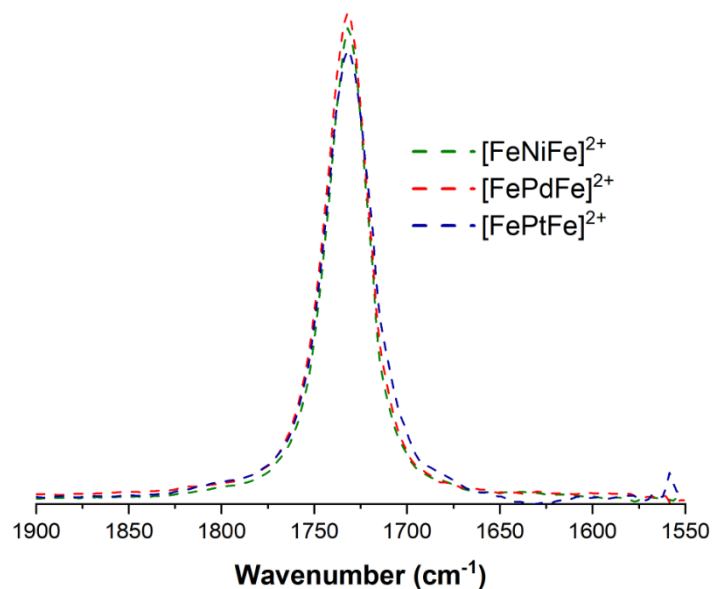

**Figure S1.** Infrared spectra of  $[\text{FeMFe}]^{2+}$  as its  $\text{BF}_4^-$  salts recorded in  $\text{CH}_3\text{CN}$ .

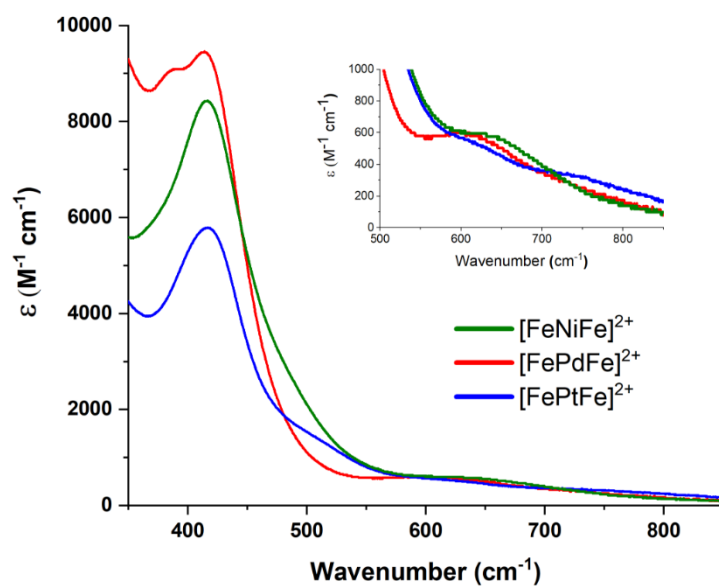

**Figure S2.** UV-Vis spectra of  $[\text{FeMFe}][\text{BF}_4]_2$  recorded in  $\text{CH}_3\text{CN}$ . Inset: expanded spectra in the visible region.



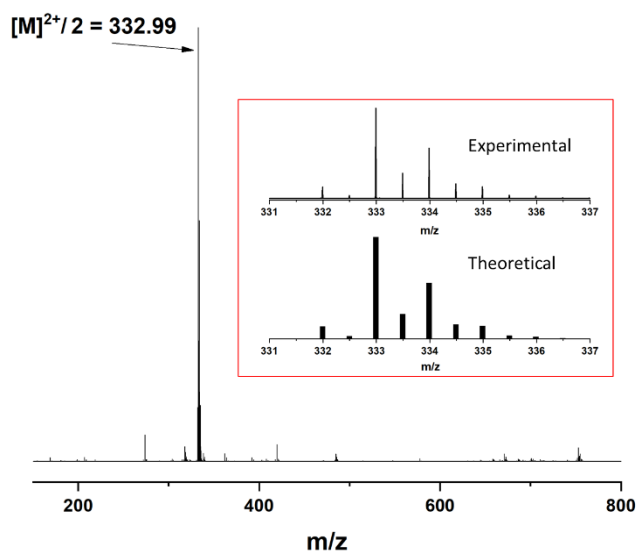

**Figure S3.** Positive-ion ESI-MS data of  $[\text{FeNiFe}]^{2+}$  with isotopic bundle (inset) recorded in  $\text{CH}_3\text{CN}$ .

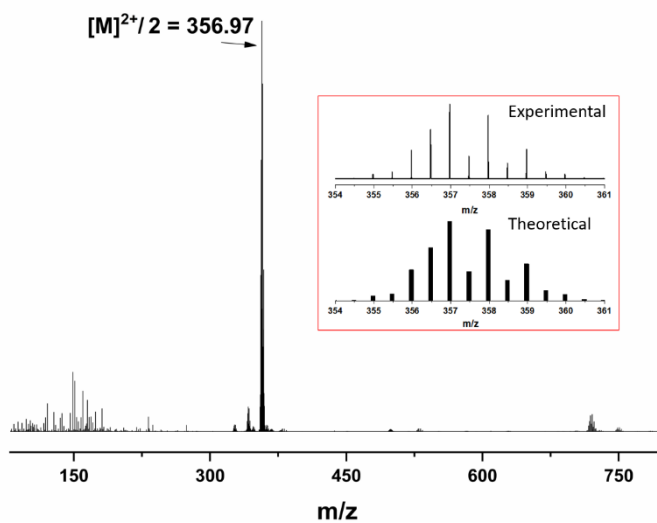

**Figure S4.** Positive-ion ESI-MS data of  $[\text{FePdFe}]^{2+}$  with isotopic bundle (inset) recorded in  $\text{CH}_3\text{CN}$ .

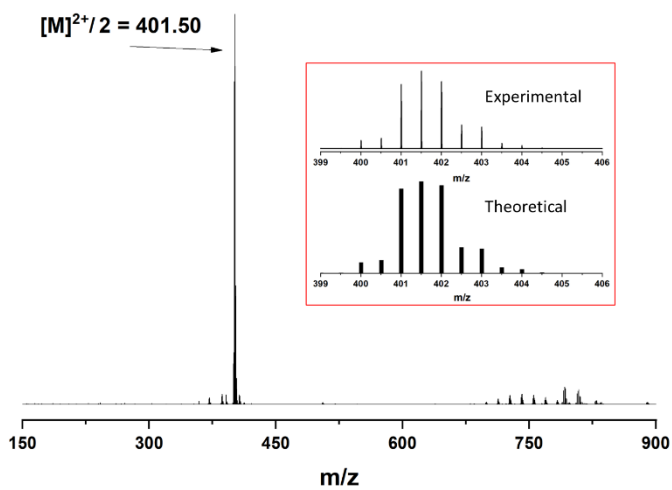

**Figure S5.** Positive-ion ESI-MS data of  $[\text{FePtFe}]^{2+}$  with isotopic bundle (inset) recorded in  $\text{CH}_3\text{CN}$ .

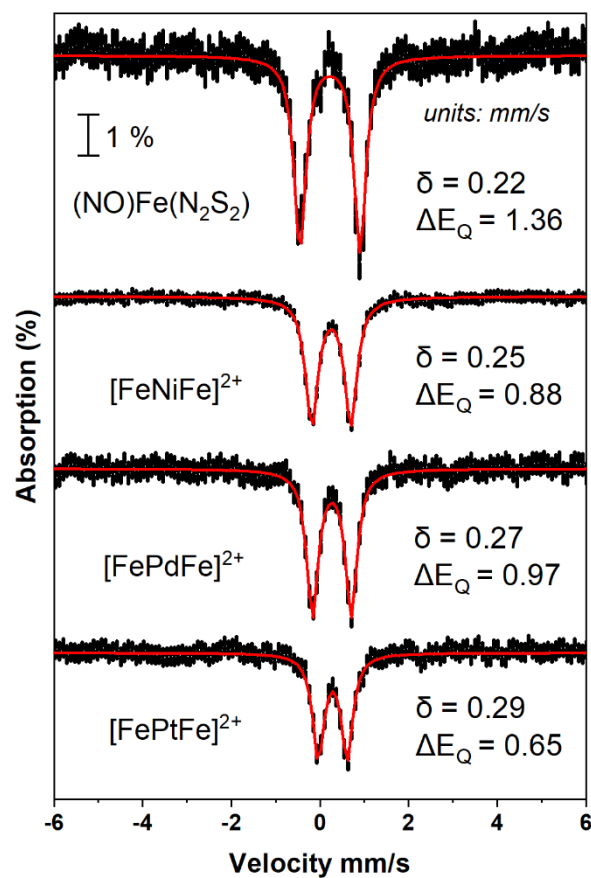

**Figure S6.** T=4.2 K, zero field  $^{57}\text{Fe}$  Mössbauer spectra of samples. The black lines represent samples of  $(\text{NO})\text{Fe}(\text{N}_2\text{S}_2)$  [ $(\text{N}_2\text{S}_2) = \text{bme-dach}$ ],  $[\text{FeNiFe}][\text{BF}_4]_2$ ,  $[\text{FePdFe}][\text{BF}_4]_2$ , and  $[\text{FePtFe}][\text{BF}_4]_2$ . Red lines show spectral simulations for the spectra with parameters shown in **Table S1**.

**Table S1.** Simulation parameters of Mössbauer spectra shown in **Figure S6**.

| Sample                    | $(\text{NO})\text{Fe}(\text{N}_2\text{S}_2)$ | $[\text{FeNiFe}][\text{BF}_4]_2$ | $[\text{FePdFe}][\text{BF}_4]_2$ | $[\text{FePtFe}][\text{BF}_4]_2$ |
|---------------------------|----------------------------------------------|----------------------------------|----------------------------------|----------------------------------|
| $\delta(\text{mm/s})$     | 0.22                                         | 0.25                             | 0.27                             | 0.29                             |
| $\Delta E_Q(\text{mm/s})$ | 1.36                                         | 0.88                             | 0.97                             | 0.65                             |
| $\Gamma(\text{mm/s})$     | 0.32                                         | 0.34                             | 0.31                             | 0.31                             |

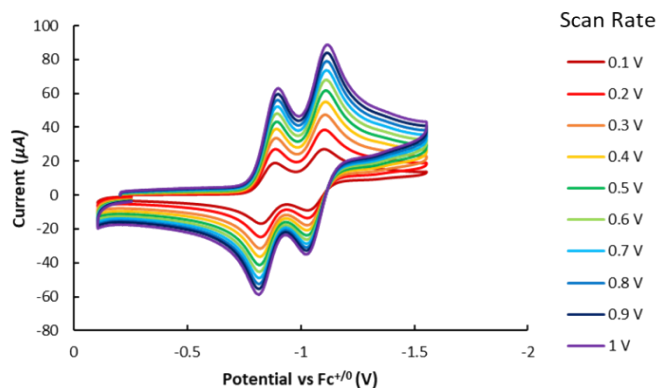

Figure S7. Scan rate dependence for the two reversible redox couples of  $[\text{FeNiFe}][\text{BF}_4]_2$  in  $\text{CH}_3\text{CN}$ .

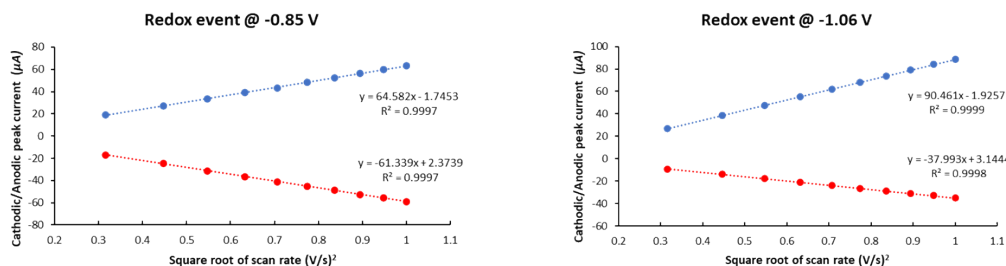

Figure S8. Plots of the cathodic/anodic peak current versus the square root of scan rate for  $[\text{FeNiFe}][\text{BF}_4]_2$  at different scan rates for the redox event at  $-0.85$  V (left) and at  $-1.06$  V (right).

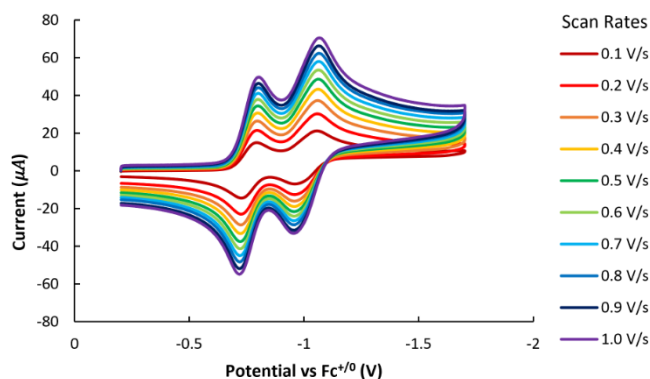

Figure S9. Scan rate dependence for the two reversible redox couples of  $[\text{FePdFe}][\text{BF}_4]_2$  in  $\text{CH}_3\text{CN}$ .

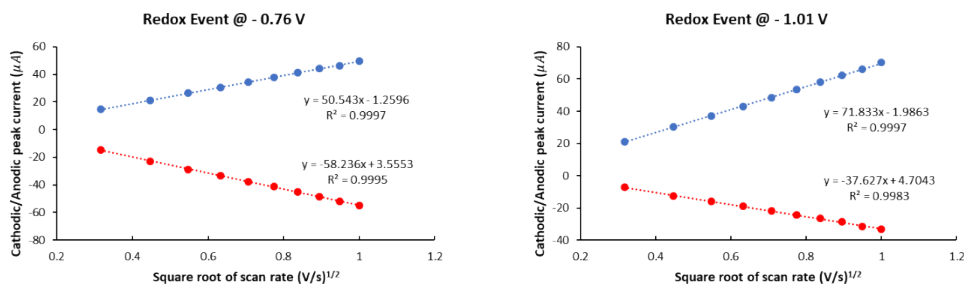

Figure S10. Plots of the cathodic/anodic peak current versus the square root of scan rate for  $[\text{FePdFe}][\text{BF}_4]_2$  at different scan rates for the redox event at  $-0.76$  V (left) and at  $-1.01$  V (right).

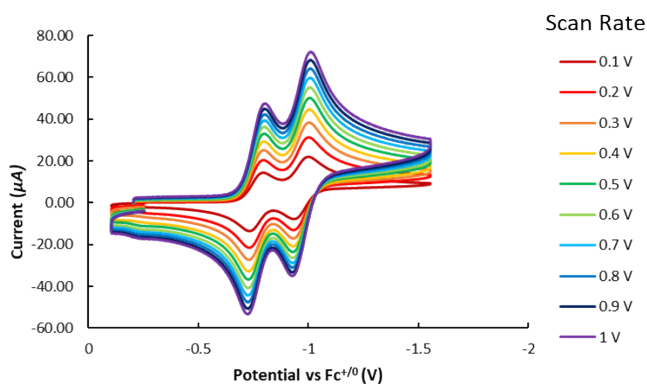

Figure S11. Scan rate dependence for the two reversible redox couples of  $[\text{FePtFe}][\text{BF}_4]_2$  in  $\text{CH}_3\text{CN}$ .

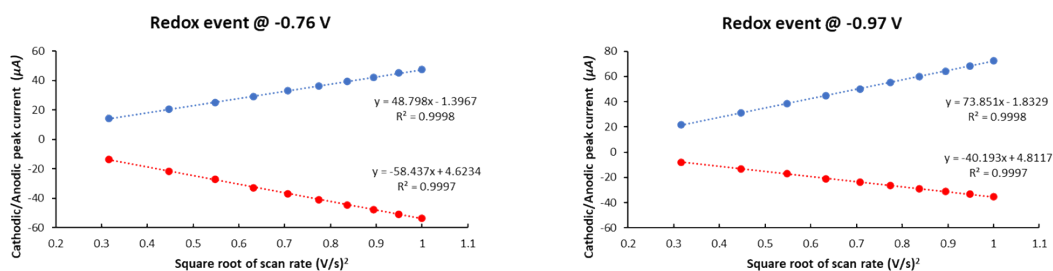

Figure S12. Plots of the cathodic/anodic peak current versus the square root of scan rate for  $[\text{FePtFe}][\text{BF}_4]_2$  at different scan rates for the redox event at  $-0.76$  V (left) and at  $-0.97$  V (right).

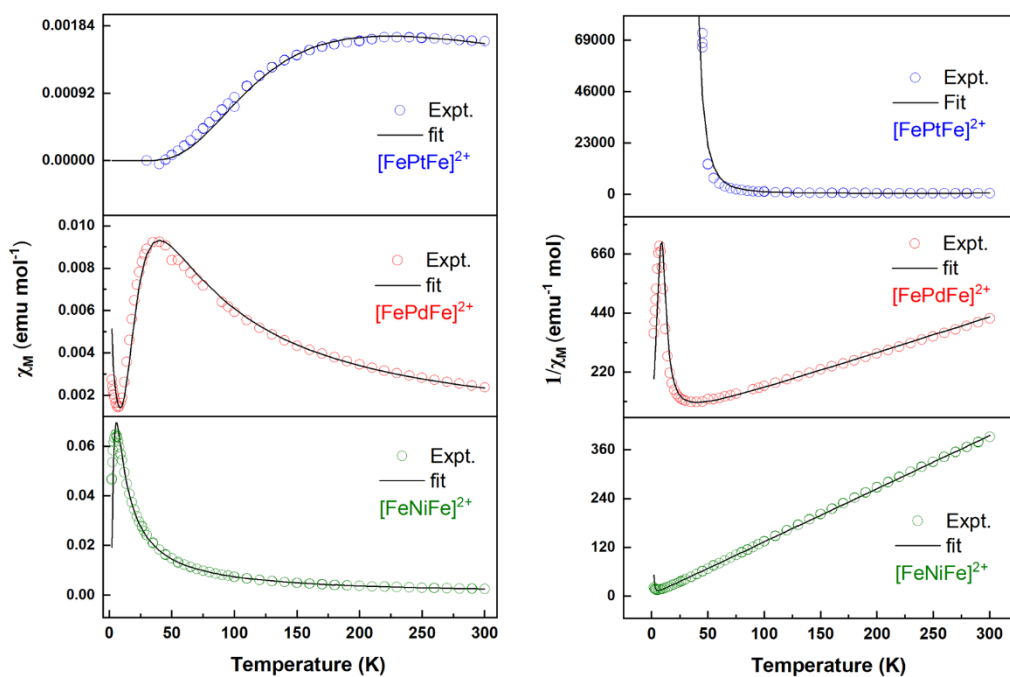

Figure S13.  $\chi_M$  vs.  $T$  (left) and  $1/\chi_M$  vs.  $T$  (right) plots of  $[\text{FeMFe}][\text{BF}_4]_2$  collected between 2 and 300 K with a 1 T field (circles: raw data, black line: fit).

**Table S2.** Crystal data and structure refinement for [FeMFe][BF<sub>4</sub>]<sub>2</sub>.

| M =                                         | Ni                                                                                                                           | Pd                                                                                                                           | Pt                                                                                                                           |
|---------------------------------------------|------------------------------------------------------------------------------------------------------------------------------|------------------------------------------------------------------------------------------------------------------------------|------------------------------------------------------------------------------------------------------------------------------|
| Identification code                         | FeNiFe_073122_0m_4                                                                                                           | FePdFe_2_0m_4                                                                                                                | MO_Q_FePtFe_107B2_0m_4                                                                                                       |
| Empirical formula                           | C <sub>22</sub> H <sub>42</sub> B <sub>2</sub> F <sub>8</sub> Fe <sub>2</sub> N <sub>8</sub> NiO <sub>2</sub> S <sub>4</sub> | C <sub>22</sub> H <sub>42</sub> B <sub>2</sub> F <sub>8</sub> Fe <sub>2</sub> N <sub>8</sub> O <sub>2</sub> PdS <sub>4</sub> | C <sub>22</sub> H <sub>42</sub> B <sub>2</sub> F <sub>8</sub> Fe <sub>2</sub> N <sub>8</sub> O <sub>2</sub> PtS <sub>4</sub> |
| Formula weight                              | 922.90                                                                                                                       | 970.59                                                                                                                       | 1059.28                                                                                                                      |
| Temperature/K                               | 110.00                                                                                                                       | 110.00                                                                                                                       | 120.00                                                                                                                       |
| Crystal system                              | triclinic                                                                                                                    | triclinic                                                                                                                    | triclinic                                                                                                                    |
| Space group                                 | P-1                                                                                                                          | P-1                                                                                                                          | P-1                                                                                                                          |
| a/Å                                         | 7.7964(6)                                                                                                                    | 7.8814(4)                                                                                                                    | 7.9001(10)                                                                                                                   |
| b/Å                                         | 11.2004(8)                                                                                                                   | 11.2000(5)                                                                                                                   | 11.1920(13)                                                                                                                  |
| c/Å                                         | 20.4101(14)                                                                                                                  | 20.5038(9)                                                                                                                   | 20.377(2)                                                                                                                    |
| α/°                                         | 85.406(2)                                                                                                                    | 85.3290(10)                                                                                                                  | 85.430(3)                                                                                                                    |
| β/°                                         | 89.714(2)                                                                                                                    | 89.1940(10)                                                                                                                  | 89.241(3)                                                                                                                    |
| γ/°                                         | 82.273(2)                                                                                                                    | 82.4020(10)                                                                                                                  | 82.767(2)                                                                                                                    |
| Volume/Å <sup>3</sup>                       | 1760.4(2)                                                                                                                    | 1788.05(14)                                                                                                                  | 1781.7(4)                                                                                                                    |
| Z                                           | 2                                                                                                                            | 2                                                                                                                            | 2                                                                                                                            |
| ρ <sub>calc</sub> /g/cm <sup>3</sup>        | 1.741                                                                                                                        | 1.803                                                                                                                        | 1.974                                                                                                                        |
| μ/mm <sup>-1</sup>                          | 1.659                                                                                                                        | 1.610                                                                                                                        | 5.033                                                                                                                        |
| F(000)                                      | 944.0                                                                                                                        | 980.0                                                                                                                        | 1044.0                                                                                                                       |
| Crystal size/mm <sup>3</sup>                | 0.142 × 0.023 × 0.015                                                                                                        | 0.3 × 0.3 × 0.3                                                                                                              | 0.3 × 0.3 × 0.3                                                                                                              |
| Radiation                                   | MoKα (λ = 0.71073)                                                                                                           | MoKα (λ = 0.71073)                                                                                                           | MoKα (λ = 0.71073)                                                                                                           |
| 2θ range for data collection/°              | 3.682 to 50.14                                                                                                               | 3.68 to 60.124                                                                                                               | 3.68 to 58.42                                                                                                                |
| Index ranges                                | -9 ≤ h ≤ 9, -13 ≤ k ≤ 13, 0 ≤ l ≤ 24                                                                                         | -11 ≤ h ≤ 11, -15 ≤ k ≤ 15, 0 ≤ l ≤ 28                                                                                       | -10 ≤ h ≤ 10, -15 ≤ k ≤ 15, 0 ≤ l ≤ 27                                                                                       |
| Reflections collected                       | 5987                                                                                                                         | 9317                                                                                                                         | 8623                                                                                                                         |
| Independent reflections                     | 5987 [R <sub>int</sub> = ?, R <sub>sigma</sub> = 0.0757]                                                                     | 9317 [R <sub>int</sub> = ?, R <sub>sigma</sub> = 0.0434]                                                                     | 8623 [R <sub>int</sub> = 0.0499, R <sub>sigma</sub> = 0.0572]                                                                |
| Data/restraints/parameters                  | 5987/3/430                                                                                                                   | 9317/0/448                                                                                                                   | 8623/0/448                                                                                                                   |
| Goodness-of-fit on F <sup>2</sup>           | 1.139                                                                                                                        | 1.172                                                                                                                        | 1.024                                                                                                                        |
| Final R indexes [I > 2σ (I)]                | R <sub>1</sub> = 0.0675 <sup>a</sup> , wR <sub>2</sub> = 0.1588 <sup>b</sup>                                                 | R <sub>1</sub> = 0.0422 <sup>a</sup> , wR <sub>2</sub> = 0.1079 <sup>b</sup>                                                 | R <sub>1</sub> = 0.0355 <sup>a</sup> , wR <sub>2</sub> = 0.0781 <sup>b</sup>                                                 |
| Final R indexes [all data]                  | R <sub>1</sub> = 0.0906 <sup>a</sup> , wR <sub>2</sub> = 0.1709 <sup>b</sup>                                                 | R <sub>1</sub> = 0.0529 <sup>a</sup> , wR <sub>2</sub> = 0.1219 <sup>b</sup>                                                 | R <sub>1</sub> = 0.0439 <sup>a</sup> , wR <sub>2</sub> = 0.0806 <sup>b</sup>                                                 |
| Largest diff. peak/hole / e Å <sup>-3</sup> | 0.65/-0.73                                                                                                                   | 0.70/-0.81                                                                                                                   | 1.64/-1.53                                                                                                                   |

$$^a R_1 = \frac{\sum (|F_o| - |F_c|)}{\sum |F_o|}, \quad ^b wR_2 = \frac{[\sum [w(F_o^2 - F_c^2)^2] / \sum [w(F_o^2)^2]]^{1/2}}{w}, \quad w = 1 / [\sigma^2(F_o^2) + (ap)^2 + bp], \quad \text{where } p = [\max(F_o^2, 0) + 2F_c^2] / 3.$$

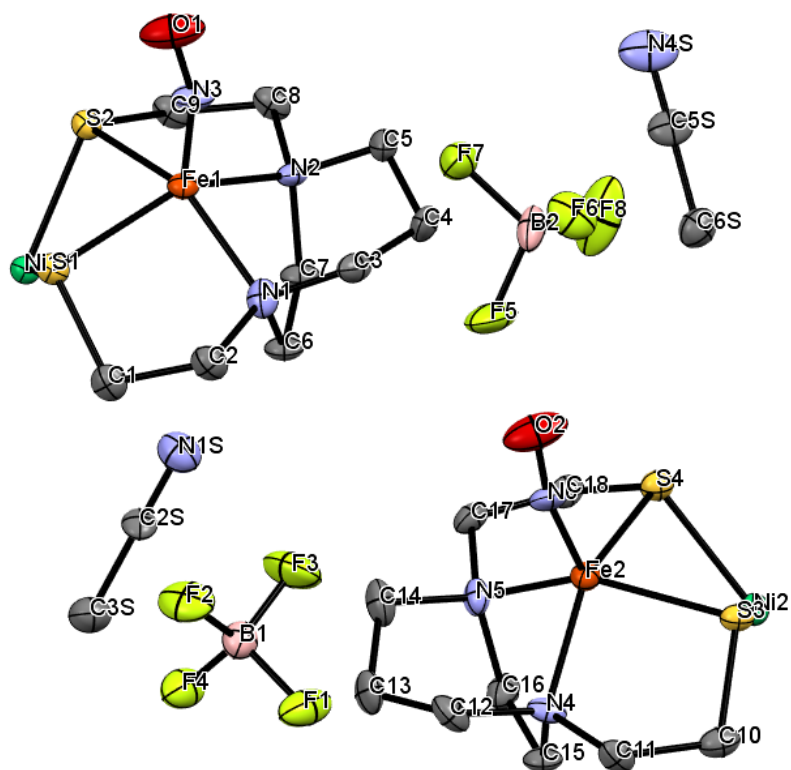

**Figure S14.** Asymmetric unit along the  $a$  axis of the  $[\text{FeNiFe}][\text{BF}_4]_2$  showing two half molecules. Hydrogen atoms omitted for clarity; thermal ellipsoids at 50 % probability.

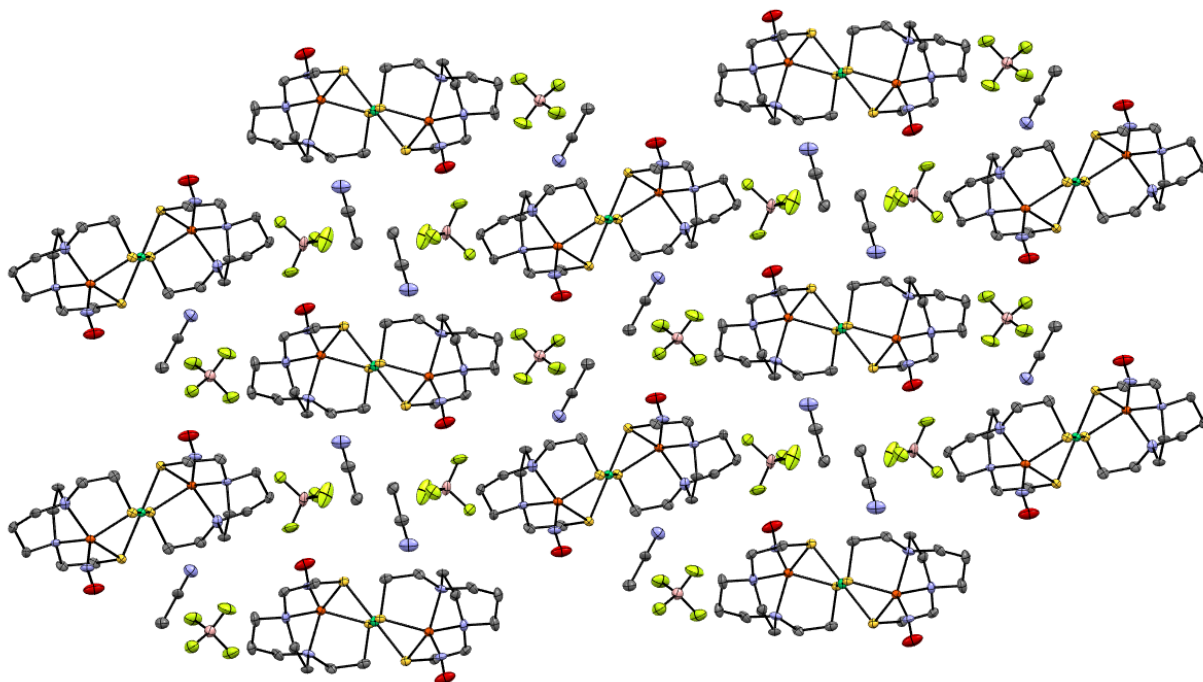

**Figure S15.** X-ray crystal packing of  $[\text{FeNiFe}][\text{BF}_4]_2$  along the  $a$  axis.

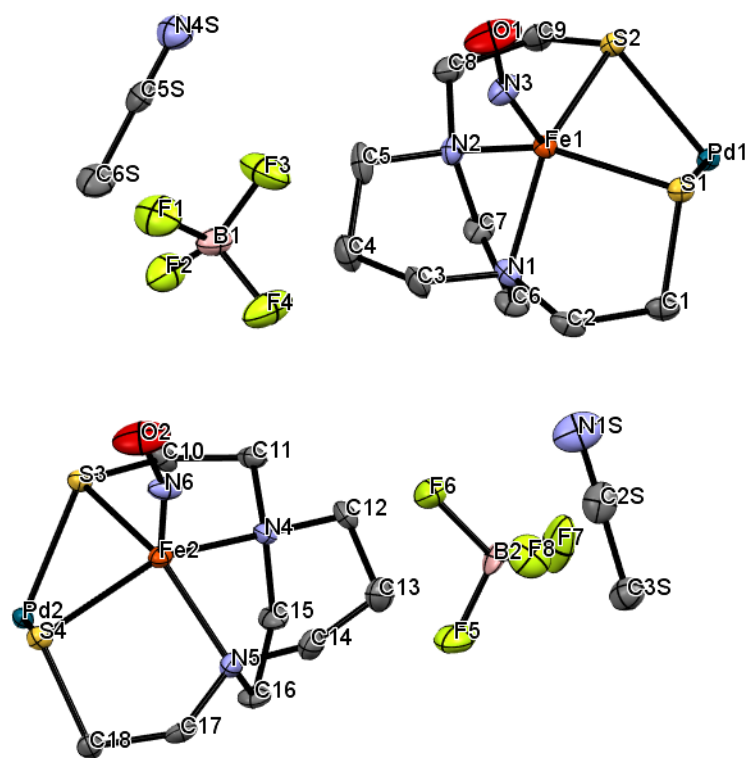

**Figure S16.** Asymmetric unit along the  $a$  axis of the  $[\text{FePdFe}][\text{BF}_4]_2$  showing two half molecules. Hydrogen atoms omitted for clarity; thermal ellipsoids at 50 % probability.

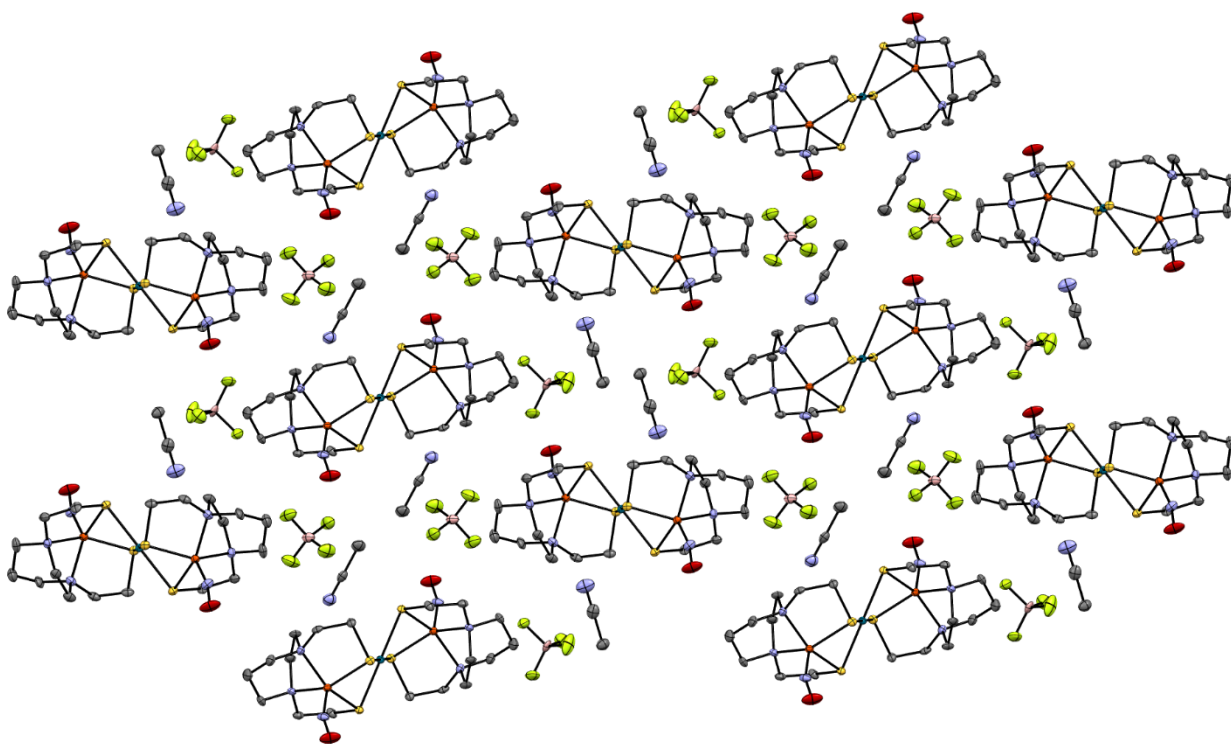

**Figure S17.** X-ray crystal packing of  $[\text{FePdFe}][\text{BF}_4]_2$  along the  $a$  axis.

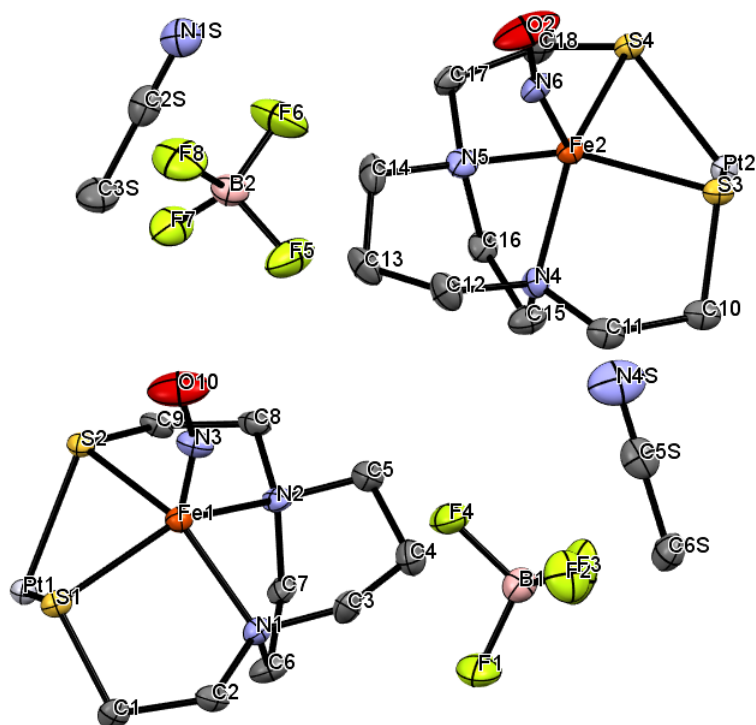

**Figure S18.** Asymmetric unit along the  $a$  axis of the  $[\text{FePtFe}][\text{BF}_4]_2$  showing two half molecules. Hydrogen atoms omitted for clarity; thermal ellipsoids at 50 % probability.

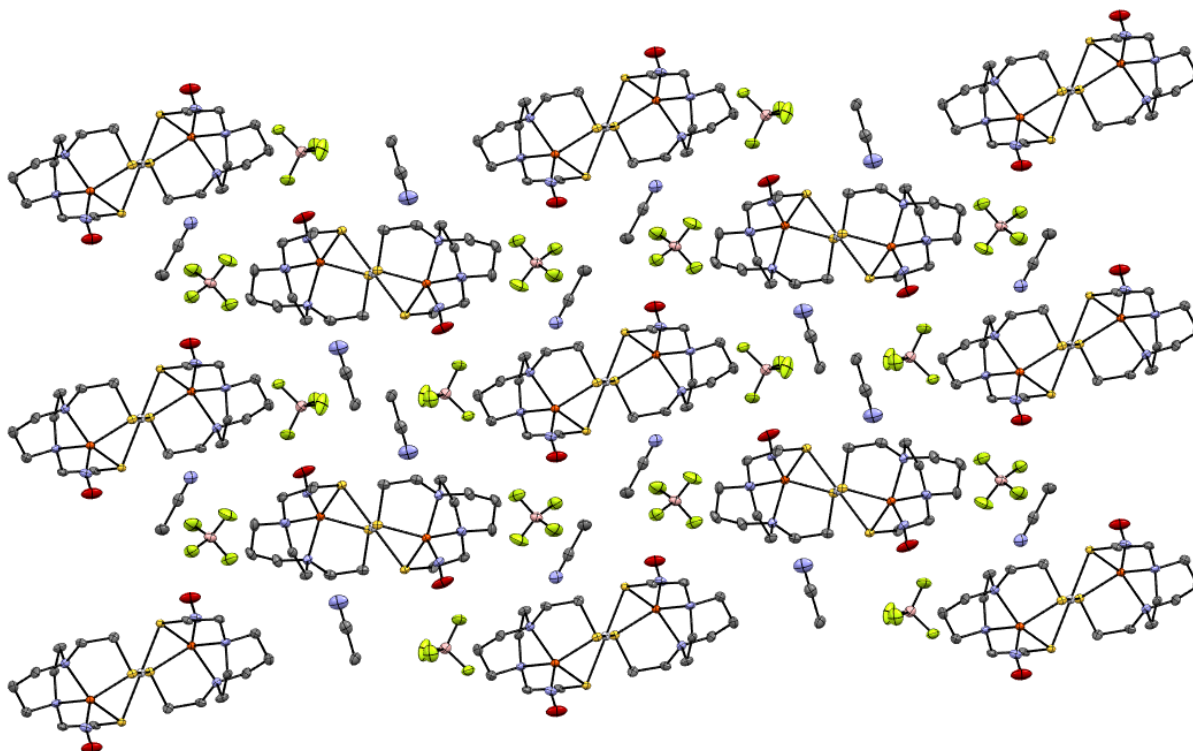

**Figure S19.** X-ray crystal packing of  $[\text{FePtFe}][\text{BF}_4]_2$  along the  $a$  axis.



**Table S3.** Selected Bond Lengths for [FeNiFe][BF<sub>4</sub>]<sub>2</sub>.

| Atom | Atom             | Length/Å   | Atom | Atom             | Length/Å   |
|------|------------------|------------|------|------------------|------------|
| Ni1  | Fe1 <sup>1</sup> | 2.9558(17) | Ni2  | Fe2 <sup>2</sup> | 2.9480(18) |
| Ni1  | Fe1              | 2.9558(17) | Ni2  | Fe2              | 2.9481(18) |
| Ni1  | S1 <sup>1</sup>  | 2.204(3)   | Ni2  | S3               | 2.206(3)   |
| Ni1  | S1               | 2.204(3)   | Ni2  | S3 <sup>2</sup>  | 2.206(3)   |
| Ni1  | S2 <sup>1</sup>  | 2.199(3)   | Ni2  | S4               | 2.202(3)   |
| Ni1  | S2               | 2.199(3)   | Ni2  | S4 <sup>2</sup>  | 2.202(3)   |
| Fe1  | S1               | 2.234(3)   | Fe2  | S3               | 2.241(3)   |
| Fe1  | S2               | 2.223(3)   | Fe2  | S4               | 2.227(4)   |
| Fe1  | N1               | 2.002(11)  | Fe2  | N4               | 2.009(10)  |
| Fe1  | N2               | 2.011(10)  | Fe2  | N5               | 2.012(10)  |
| Fe1  | N3               | 1.687(10)  | Fe2  | N6               | 1.671(11)  |
| S1   | C1               | 1.841(13)  | S3   | C10              | 1.824(13)  |
| S2   | C9               | 1.832(12)  | S4   | C18              | 1.835(12)  |
| O1   | N3               | 1.161(13)  | O2   | N6               | 1.169(14)  |

<sup>1</sup>2-X,1-Y,-Z; <sup>2</sup>1-X,-Y,1-Z**Table S4.** Selected Bond Lengths for [FePdFe][BF<sub>4</sub>]<sub>2</sub>.

| Atom | Atom             | Length/Å   | Atom | Atom             | Length/Å   |
|------|------------------|------------|------|------------------|------------|
| Pd1  | Fe1              | 3.0030(8)  | Pd2  | Fe2 <sup>2</sup> | 3.0084(8)  |
| Pd1  | Fe1 <sup>1</sup> | 3.0030(8)  | Pd2  | Fe2              | 3.0084(8)  |
| Pd1  | S1 <sup>1</sup>  | 2.3173(14) | Pd2  | S3 <sup>2</sup>  | 2.3177(14) |
| Pd1  | S1               | 2.3173(14) | Pd2  | S3               | 2.3177(14) |
| Pd1  | S2 <sup>1</sup>  | 2.3266(15) | Pd2  | S4               | 2.3197(14) |
| Pd1  | S2               | 2.3265(15) | Pd2  | S4 <sup>2</sup>  | 2.3197(14) |
| Fe1  | S1               | 2.2602(17) | Fe2  | S3               | 2.2403(17) |
| Fe1  | S2               | 2.2416(17) | Fe2  | S4               | 2.2528(17) |
| Fe1  | N1               | 2.017(5)   | Fe2  | N4               | 2.017(5)   |
| Fe1  | N2               | 2.018(5)   | Fe2  | N5               | 2.020(5)   |
| Fe1  | N3               | 1.691(5)   | Fe2  | N6               | 1.697(5)   |
| S1   | C1               | 1.841(6)   | S3   | C10              | 1.842(6)   |
| S2   | C9               | 1.843(7)   | S4   | C18              | 1.851(6)   |
| O1   | N3               | 1.160(7)   | O2   | N6               | 1.159(7)   |

<sup>1</sup>2-X,1-Y,-Z; <sup>2</sup>1-X,-Y,1-Z**Table S5.** Selected Bond Lengths for [FePtFe][BF<sub>4</sub>]<sub>2</sub>.

| Atom | Atom             | Length/Å   | Atom | Atom             | Length/Å   |
|------|------------------|------------|------|------------------|------------|
| Pt1  | Fe1              | 2.9707(9)  | Pt2  | Fe2              | 2.9678(9)  |
| Pt1  | Fe1 <sup>1</sup> | 2.9707(9)  | Pt2  | Fe2 <sup>2</sup> | 2.9677(9)  |
| Pt1  | S1               | 2.3156(16) | Pt2  | S3 <sup>2</sup>  | 2.3127(16) |
| Pt1  | S1 <sup>1</sup>  | 2.3156(16) | Pt2  | S3               | 2.3127(16) |
| Pt1  | S2 <sup>1</sup>  | 2.3185(15) | Pt2  | S4 <sup>2</sup>  | 2.3242(16) |
| Pt1  | S2               | 2.3185(15) | Pt2  | S4               | 2.3242(16) |
| Fe1  | S1               | 2.2638(19) | Fe2  | S3               | 2.268(2)   |
| Fe1  | S2               | 2.2474(18) | Fe2  | S4               | 2.2480(18) |
| Fe1  | N1               | 2.010(5)   | Fe2  | N4               | 2.009(6)   |
| Fe1  | N2               | 2.009(6)   | Fe2  | N5               | 2.013(6)   |
| Fe1  | N3               | 1.689(5)   | Fe2  | N6               | 1.686(5)   |
| S1   | C1               | 1.829(6)   | S3   | C10              | 1.835(7)   |
| S2   | C9               | 1.837(6)   | S4   | C18              | 1.836(7)   |
| O10  | N3               | 1.156(7)   | O2   | N6               | 1.159(7)   |

<sup>1</sup>2-X,1-Y,-Z; <sup>2</sup>1-X,-Y,1-Z

**Table 6. Bond Angles for [FeNiFe][BF4]<sub>2</sub>.**

| Atom             | Atom | Atom             | Angle/°   | Atom            | Atom | Atom             | Angle/°    |
|------------------|------|------------------|-----------|-----------------|------|------------------|------------|
| Fe1              | Ni1  | Fe1 <sup>1</sup> | 180.0     | S4 <sup>2</sup> | Ni2  | Fe2              | 131.37(9)  |
| S1               | Ni1  | Fe1 <sup>1</sup> | 131.33(8) | S4 <sup>2</sup> | Ni2  | Fe2 <sup>2</sup> | 48.63(9)   |
| S1               | Ni1  | Fe1              | 48.67(8)  | S4              | Ni2  | Fe2              | 48.63(9)   |
| S1 <sup>1</sup>  | Ni1  | Fe1 <sup>1</sup> | 48.67(8)  | S4              | Ni2  | S3               | 83.89(11)  |
| S1 <sup>1</sup>  | Ni1  | Fe1              | 131.33(8) | S4 <sup>2</sup> | Ni2  | S3 <sup>2</sup>  | 83.89(11)  |
| S1 <sup>1</sup>  | Ni1  | S1               | 180.0     | S4              | Ni2  | S3 <sup>2</sup>  | 96.11(11)  |
| S2 <sup>1</sup>  | Ni1  | Fe1 <sup>1</sup> | 48.41(8)  | S4 <sup>2</sup> | Ni2  | S3               | 96.11(11)  |
| S2 <sup>1</sup>  | Ni1  | Fe1              | 131.59(8) | S4 <sup>2</sup> | Ni2  | S4               | 180.00(16) |
| S2               | Ni1  | Fe1 <sup>1</sup> | 131.59(8) | S3              | Fe2  | Ni2              | 47.96(9)   |
| S2               | Ni1  | Fe1              | 48.41(8)  | S4              | Fe2  | Ni2              | 47.90(9)   |
| S2 <sup>1</sup>  | Ni1  | S1               | 95.16(11) | S4              | Fe2  | S3               | 82.50(13)  |
| S2               | Ni1  | S1               | 84.84(11) | N4              | Fe2  | Ni2              | 102.3(3)   |
| S2               | Ni1  | S1 <sup>1</sup>  | 95.16(11) | N4              | Fe2  | S3               | 87.8(3)    |
| S2 <sup>1</sup>  | Ni1  | S1 <sup>1</sup>  | 84.84(11) | N4              | Fe2  | S4               | 145.1(3)   |
| S2               | Ni1  | S2 <sup>1</sup>  | 180.0     | N4              | Fe2  | N5               | 79.8(4)    |
| S1               | Fe1  | Ni1              | 47.80(8)  | N5              | Fe2  | Ni2              | 102.0(3)   |
| S2               | Fe1  | Ni1              | 47.71(9)  | N5              | Fe2  | S3               | 144.1(3)   |
| S2               | Fe1  | S1               | 83.57(12) | N5              | Fe2  | S4               | 88.7(3)    |
| N1               | Fe1  | Ni1              | 104.8(3)  | N6              | Fe2  | Ni2              | 139.2(4)   |
| N1               | Fe1  | S1               | 88.5(3)   | N6              | Fe2  | S3               | 108.4(4)   |
| N1               | Fe1  | S2               | 146.5(3)  | N6              | Fe2  | S4               | 104.7(4)   |
| N1               | Fe1  | N2               | 80.0(4)   | N6              | Fe2  | N4               | 110.1(5)   |
| N2               | Fe1  | Ni1              | 104.2(3)  | N6              | Fe2  | N5               | 107.5(5)   |
| N2               | Fe1  | S1               | 145.8(3)  | Ni2             | S3   | Fe2              | 83.07(11)  |
| N2               | Fe1  | S2               | 88.5(3)   | C10             | S3   | Ni2              | 109.7(4)   |
| N3               | Fe1  | Ni1              | 135.4(4)  | C10             | S3   | Fe2              | 100.2(4)   |
| N3               | Fe1  | S1               | 105.8(4)  | Ni2             | S4   | Fe2              | 83.46(12)  |
| N3               | Fe1  | S2               | 103.4(4)  | C18             | S4   | Ni2              | 109.2(4)   |
| N3               | Fe1  | N1               | 110.1(5)  | C18             | S4   | Fe2              | 99.5(4)    |
| N3               | Fe1  | N2               | 108.4(5)  | F2              | B1   | F1               | 109.4(12)  |
| Ni1              | S1   | Fe1              | 83.53(11) | F2              | B1   | F4               | 111.4(12)  |
| C1               | S1   | Ni1              | 109.8(4)  | F3              | B1   | F1               | 107.6(12)  |
| C1               | S1   | Fe1              | 99.7(4)   | F3              | B1   | F2               | 109.8(13)  |
| Ni1              | S2   | Fe1              | 83.88(11) | F3              | B1   | F4               | 111.5(13)  |
| C9               | S2   | Ni1              | 109.3(4)  | F4              | B1   | F1               | 107.1(12)  |
| C9               | S2   | Fe1              | 99.9(4)   | F5              | B2   | F6               | 108.6(13)  |
| C2               | N1   | Fe1              | 111.8(8)  | F5              | B2   | F7               | 108.1(12)  |
| C3               | N1   | Fe1              | 112.0(8)  | F5              | B2   | F8               | 112.7(13)  |
| C3               | N1   | C2               | 107.8(10) | F6              | B2   | F7               | 108.8(12)  |
| C6               | N1   | Fe1              | 103.2(7)  | F8              | B2   | F6               | 109.6(12)  |
| C6               | N1   | C2               | 111.9(10) | F8              | B2   | F7               | 109.0(14)  |
| C6               | N1   | C3               | 110.2(10) | N1S             | C2S  | C3S              | 179.5(16)  |
| C5               | N2   | Fe1              | 111.3(8)  | C11             | N4   | Fe2              | 112.3(7)   |
| C5               | N2   | C7               | 110.7(9)  | C11             | N4   | C12              | 107.3(9)   |
| C7               | N2   | Fe1              | 102.5(7)  | C11             | N4   | C15              | 112.4(10)  |
| C8               | N2   | Fe1              | 112.5(7)  | C12             | N4   | Fe2              | 112.1(8)   |
| C8               | N2   | C5               | 107.8(9)  | C15             | N4   | Fe2              | 102.4(7)   |
| C8               | N2   | C7               | 112.0(9)  | C15             | N4   | C12              | 110.4(10)  |
| O1               | N3   | Fe1              | 159.8(11) | N4S             | C5S  | C6S              | 179.0(17)  |
| C2               | C1   | S1               | 108.8(9)  | C14             | N5   | Fe2              | 113.0(8)   |
| C1               | C2   | N1               | 112.8(10) | C16             | N5   | Fe2              | 101.7(7)   |
| N1               | C3   | C4               | 112.4(10) | C16             | N5   | C14              | 111.1(10)  |
| C3               | C4   | C5               | 114.8(10) | C17             | N5   | Fe2              | 111.6(8)   |
| N2               | C5   | C4               | 112.8(10) | C17             | N5   | C14              | 107.1(10)  |
| N1               | C6   | C7               | 110.8(10) | C17             | N5   | C16              | 112.4(9)   |
| N2               | C7   | C6               | 110.1(10) | O2              | N6   | Fe2              | 165.5(11)  |
| N2               | C8   | C9               | 112.3(10) | C11             | C10  | S3               | 109.3(9)   |
| C8               | C9   | S2               | 109.7(8)  | N4              | C11  | C10              | 112.4(10)  |
| Fe2 <sup>2</sup> | Ni2  | Fe2              | 180.0     | N4              | C12  | C13              | 112.7(10)  |
| S3               | Ni2  | Fe2              | 48.98(9)  | C14             | C13  | C12              | 115.3(11)  |
| S3 <sup>2</sup>  | Ni2  | Fe2 <sup>2</sup> | 48.98(9)  | C13             | C14  | N5               | 112.6(11)  |
| S3               | Ni2  | Fe2 <sup>2</sup> | 131.02(9) | N4              | C15  | C16              | 110.7(10)  |
| S3 <sup>2</sup>  | Ni2  | Fe2              | 131.02(9) | N5              | C16  | C15              | 110.0(10)  |
| S3 <sup>2</sup>  | Ni2  | S3               | 180.0     | N5              | C17  | C18              | 112.9(10)  |
| S4               | Ni2  | Fe2 <sup>2</sup> | 131.37(9) | C17             | C18  | S4               | 110.5(9)   |

<sup>1</sup>2-X,1-Y,-Z; <sup>2</sup>1-X,-Y,1-Z

**Table 7. Bond Angles for [FePdFe][BF4]<sub>2</sub>.**

| Atom             | Atom | Atom             | Angle/°    | Atom            | Atom | Atom             | Angle/°    |
|------------------|------|------------------|------------|-----------------|------|------------------|------------|
| Fe1 <sup>1</sup> | Pd1  | Fe1              | 180.0      | S3 <sup>2</sup> | Pd2  | S4               | 97.08(5)   |
| S1               | Pd1  | Fe1              | 48.18(4)   | S3 <sup>2</sup> | Pd2  | S4 <sup>2</sup>  | 82.92(5)   |
| S1 <sup>1</sup>  | Pd1  | Fe1              | 131.82(4)  | S3              | Pd2  | S4               | 82.92(5)   |
| S1               | Pd1  | Fe1 <sup>1</sup> | 131.82(4)  | S4              | Pd2  | Fe2 <sup>2</sup> | 132.09(4)  |
| S1 <sup>1</sup>  | Pd1  | Fe1 <sup>1</sup> | 48.18(4)   | S4              | Pd2  | Fe2              | 47.91(4)   |
| S1               | Pd1  | S1 <sup>1</sup>  | 180.0      | S4 <sup>2</sup> | Pd2  | Fe2 <sup>2</sup> | 47.91(4)   |
| S1               | Pd1  | S2 <sup>1</sup>  | 98.09(5)   | S4 <sup>2</sup> | Pd2  | Fe2              | 132.09(4)  |
| S1 <sup>1</sup>  | Pd1  | S2               | 98.09(5)   | S4 <sup>2</sup> | Pd2  | S4               | 180.0      |
| S1               | Pd1  | S2               | 81.91(5)   | S3              | Fe2  | Pd2              | 49.82(4)   |
| S1 <sup>1</sup>  | Pd1  | S2 <sup>1</sup>  | 81.91(5)   | S3              | Fe2  | S4               | 86.21(6)   |
| S2 <sup>1</sup>  | Pd1  | Fe1 <sup>1</sup> | 47.69(4)   | S4              | Fe2  | Pd2              | 49.82(4)   |
| S2               | Pd1  | Fe1 <sup>1</sup> | 132.31(4)  | N4              | Fe2  | Pd2              | 103.80(16) |
| S2 <sup>1</sup>  | Pd1  | Fe1              | 132.31(4)  | N4              | Fe2  | S3               | 88.15(16)  |
| S2               | Pd1  | Fe1              | 47.69(4)   | N4              | Fe2  | S4               | 147.17(15) |
| S2               | Pd1  | S2 <sup>1</sup>  | 180.0      | N4              | Fe2  | N5               | 80.2(2)    |
| S1               | Fe1  | Pd1              | 49.83(4)   | N5              | Fe2  | Pd2              | 104.45(15) |
| S2               | Fe1  | Pd1              | 50.13(4)   | N5              | Fe2  | S3               | 148.23(16) |
| S2               | Fe1  | S1               | 85.09(6)   | N5              | Fe2  | S4               | 87.87(15)  |
| N1               | Fe1  | Pd1              | 102.32(15) | N6              | Fe2  | Pd2              | 136.5(2)   |
| N1               | Fe1  | S1               | 87.58(16)  | N6              | Fe2  | S3               | 102.66(18) |
| N1               | Fe1  | S2               | 147.27(16) | N6              | Fe2  | S4               | 104.3(2)   |
| N1               | Fe1  | N2               | 80.1(2)    | N6              | Fe2  | N4               | 108.4(2)   |
| N2               | Fe1  | Pd1              | 101.40(15) | N6              | Fe2  | N5               | 109.0(2)   |
| N2               | Fe1  | S1               | 145.42(16) | Fe2             | S3   | Pd2              | 82.58(5)   |
| N2               | Fe1  | S2               | 88.10(16)  | C10             | S3   | Pd2              | 106.9(2)   |
| N3               | Fe1  | Pd1              | 140.0(2)   | C10             | S3   | Fe2              | 99.8(2)    |
| N3               | Fe1  | S1               | 106.91(19) | Fe2             | S4   | Pd2              | 82.27(5)   |
| N3               | Fe1  | S2               | 103.4(2)   | C18             | S4   | Pd2              | 107.7(2)   |
| N3               | Fe1  | N1               | 109.3(2)   | C18             | S4   | Fe2              | 99.9(2)    |
| N3               | Fe1  | N2               | 107.7(2)   | C11             | N4   | Fe2              | 112.9(4)   |
| Fe1              | S1   | Pd1              | 81.99(5)   | C11             | N4   | C12              | 107.0(5)   |
| C1               | S1   | Pd1              | 107.9(2)   | C11             | N4   | C15              | 112.2(5)   |
| C1               | S1   | Fe1              | 99.7(2)    | C12             | N4   | Fe2              | 111.8(4)   |
| Fe1              | S2   | Pd1              | 82.18(5)   | C15             | N4   | Fe2              | 101.9(4)   |
| C9               | S2   | Pd1              | 106.9(2)   | C15             | N4   | C12              | 111.2(5)   |
| C9               | S2   | Fe1              | 99.7(2)    | C14             | N5   | Fe2              | 112.0(4)   |
| C2               | N1   | Fe1              | 112.2(4)   | C14             | N5   | C16              | 111.2(5)   |
| C2               | N1   | C3               | 107.1(5)   | C14             | N5   | C17              | 107.3(5)   |
| C2               | N1   | C6               | 112.2(5)   | C16             | N5   | Fe2              | 102.1(4)   |
| C3               | N1   | Fe1              | 112.1(4)   | C17             | N5   | Fe2              | 112.6(4)   |
| C3               | N1   | C6               | 111.4(5)   | C17             | N5   | C16              | 111.7(5)   |
| C6               | N1   | Fe1              | 101.9(4)   | O2              | N6   | Fe2              | 158.6(6)   |
| C5               | N2   | Fe1              | 112.1(4)   | C11             | C10  | S3               | 108.8(4)   |
| C7               | N2   | Fe1              | 101.9(4)   | N4              | C11  | C10              | 112.2(5)   |
| C7               | N2   | C5               | 110.6(5)   | N4              | C12  | C13              | 113.2(5)   |
| C8               | N2   | Fe1              | 113.1(4)   | C12             | C13  | C14              | 115.0(6)   |
| C8               | N2   | C5               | 106.5(5)   | N5              | C14  | C13              | 113.1(6)   |
| C8               | N2   | C7               | 112.7(5)   | N4              | C15  | C16              | 110.8(5)   |
| O1               | N3   | Fe1              | 162.7(6)   | N5              | C16  | C15              | 110.2(5)   |
| C2               | C1   | S1               | 108.9(4)   | N5              | C17  | C18              | 112.6(5)   |
| N1               | C2   | C1               | 112.9(5)   | C17             | C18  | S4               | 108.0(4)   |
| N1               | C3   | C4               | 111.8(6)   | F2              | B1   | F1               | 110.1(6)   |
| C5               | C4   | C3               | 114.6(6)   | F2              | B1   | F3               | 111.2(6)   |
| C4               | C5   | N2               | 113.2(6)   | F2              | B1   | F4               | 108.9(6)   |
| N1               | C6   | C7               | 109.9(5)   | F3              | B1   | F1               | 108.3(6)   |
| N2               | C7   | C6               | 110.9(5)   | F3              | B1   | F4               | 109.1(7)   |
| N2               | C8   | C9               | 112.5(5)   | F4              | B1   | F1               | 109.2(6)   |
| C8               | C9   | S2               | 110.3(4)   | F5              | B2   | F6               | 108.1(6)   |
| Fe2              | Pd2  | Fe2 <sup>2</sup> | 180.0      | F7              | B2   | F5               | 110.0(6)   |
| S3               | Pd2  | Fe2              | 47.60(4)   | F7              | B2   | F6               | 109.0(6)   |
| S3 <sup>2</sup>  | Pd2  | Fe2              | 132.40(4)  | F7              | B2   | F8               | 110.6(6)   |
| S3               | Pd2  | Fe2 <sup>2</sup> | 132.40(4)  | F8              | B2   | F5               | 109.5(6)   |
| S3 <sup>2</sup>  | Pd2  | Fe2 <sup>2</sup> | 47.60(4)   | F8              | B2   | F6               | 109.6(6)   |
| S3 <sup>2</sup>  | Pd2  | S3               | 180.0      | N1S             | C2S  | C3S              | 179.2(9)   |
| S3               | Pd2  | S4 <sup>2</sup>  | 97.08(5)   | N4S             | C5S  | C6S              | 179.4(8)   |

<sup>1</sup>2-X,1-Y,2-Z; <sup>2</sup>1-X,-Y,1-Z

**Table 8. Bond Angles for [FePtFe][BF4]<sub>2</sub>.**

| Atom             | Atom | Atom             | Angle/°    | Atom            | Atom | Atom             | Angle/°    |
|------------------|------|------------------|------------|-----------------|------|------------------|------------|
| Fe1 <sup>1</sup> | Pt1  | Fe1              | 180.0      | S3 <sup>2</sup> | Pt2  | S4 <sup>2</sup>  | 82.36(6)   |
| S1               | Pt1  | Fe1              | 48.80(4)   | S3 <sup>2</sup> | Pt2  | S4               | 97.64(6)   |
| S1 <sup>1</sup>  | Pt1  | Fe1 <sup>1</sup> | 48.80(4)   | S3              | Pt2  | S4 <sup>2</sup>  | 97.64(6)   |
| S1 <sup>1</sup>  | Pt1  | Fe1              | 131.20(4)  | S4 <sup>2</sup> | Pt2  | Fe2              | 131.58(4)  |
| S1               | Pt1  | Fe1 <sup>1</sup> | 131.20(4)  | S4              | Pt2  | Fe2 <sup>2</sup> | 131.58(4)  |
| S1 <sup>1</sup>  | Pt1  | S1               | 180.0      | S4 <sup>2</sup> | Pt2  | Fe2 <sup>2</sup> | 48.42(4)   |
| S1 <sup>1</sup>  | Pt1  | S2               | 96.61(5)   | S4              | Pt2  | Fe2              | 48.42(4)   |
| S1               | Pt1  | S2               | 83.39(5)   | S4              | Pt2  | S4 <sup>2</sup>  | 180.00(7)  |
| S1               | Pt1  | S2 <sup>1</sup>  | 96.61(5)   | S3              | Fe2  | Pt2              | 50.28(4)   |
| S1 <sup>1</sup>  | Pt1  | S2 <sup>1</sup>  | 83.39(5)   | S4              | Fe2  | Pt2              | 50.66(4)   |
| S2 <sup>1</sup>  | Pt1  | Fe1              | 131.62(4)  | S4              | Fe2  | S3               | 85.07(7)   |
| S2               | Pt1  | Fe1 <sup>1</sup> | 131.62(4)  | N4              | Fe2  | Pt2              | 101.88(15) |
| S2               | Pt1  | Fe1              | 48.38(4)   | N4              | Fe2  | S3               | 88.11(16)  |
| S2 <sup>1</sup>  | Pt1  | Fe1 <sup>1</sup> | 48.38(4)   | N4              | Fe2  | S4               | 147.39(16) |
| S2 <sup>1</sup>  | Pt1  | S2               | 180.00(7)  | N4              | Fe2  | N5               | 79.2(2)    |
| S1               | Fe1  | Pt1              | 50.32(4)   | N5              | Fe2  | Pt2              | 101.03(18) |
| S2               | Fe1  | Pt1              | 50.46(4)   | N5              | Fe2  | S3               | 145.58(18) |
| S2               | Fe1  | S1               | 86.20(7)   | N5              | Fe2  | S4               | 88.64(18)  |
| N1               | Fe1  | Pt1              | 103.58(15) | N6              | Fe2  | Pt2              | 141.1(2)   |
| N1               | Fe1  | S1               | 87.97(16)  | N6              | Fe2  | S3               | 107.19(19) |
| N1               | Fe1  | S2               | 148.33(16) | N6              | Fe2  | S4               | 103.3(2)   |
| N2               | Fe1  | Pt1              | 102.95(18) | N6              | Fe2  | N4               | 109.2(2)   |
| N2               | Fe1  | S1               | 147.12(17) | N6              | Fe2  | N5               | 107.2(3)   |
| N2               | Fe1  | S2               | 88.31(18)  | Fe2             | S3   | Pt2              | 80.75(6)   |
| N2               | Fe1  | N1               | 80.0(2)    | C10             | S3   | Pt2              | 107.1(2)   |
| N3               | Fe1  | Pt1              | 137.7(2)   | C10             | S3   | Fe2              | 99.1(2)    |
| N3               | Fe1  | S1               | 104.4(2)   | Fe2             | S4   | Pt2              | 80.93(5)   |
| N3               | Fe1  | S2               | 102.4(2)   | C18             | S4   | Pt2              | 105.8(2)   |
| N3               | Fe1  | N1               | 109.2(3)   | C18             | S4   | Fe2              | 99.5(2)    |
| N3               | Fe1  | N2               | 108.4(3)   | C11             | N4   | Fe2              | 112.4(4)   |
| Fe1              | S1   | Pt1              | 80.88(6)   | C11             | N4   | C12              | 107.0(5)   |
| C1               | S1   | Pt1              | 106.9(2)   | C12             | N4   | Fe2              | 112.1(4)   |
| C1               | S1   | Fe1              | 98.8(2)    | C15             | N4   | Fe2              | 102.8(4)   |
| Fe1              | S2   | Pt1              | 81.16(5)   | C15             | N4   | C11              | 111.9(5)   |
| C9               | S2   | Pt1              | 105.7(2)   | C15             | N4   | C12              | 110.6(6)   |
| C9               | S2   | Fe1              | 99.4(2)    | C14             | N5   | Fe2              | 113.0(4)   |
| C2               | N1   | Fe1              | 112.5(4)   | C16             | N5   | Fe2              | 103.4(4)   |
| C2               | N1   | C6               | 112.2(5)   | C16             | N5   | C14              | 110.2(6)   |
| C3               | N1   | Fe1              | 112.1(4)   | C16             | N5   | C17              | 112.1(5)   |
| C3               | N1   | C2               | 107.1(5)   | C17             | N5   | Fe2              | 112.3(4)   |
| C3               | N1   | C6               | 110.9(5)   | C17             | N5   | C14              | 105.9(6)   |
| C6               | N1   | Fe1              | 102.1(4)   | O2              | N6   | Fe2              | 165.2(6)   |
| C5               | N2   | Fe1              | 112.0(4)   | C11             | C10  | S3               | 110.0(5)   |
| C7               | N2   | Fe1              | 102.9(4)   | N4              | C11  | C10              | 113.0(5)   |
| C7               | N2   | C5               | 110.6(5)   | N4              | C12  | C13              | 112.9(6)   |
| C8               | N2   | Fe1              | 112.5(4)   | C12             | C13  | C14              | 114.8(6)   |
| C8               | N2   | C5               | 106.7(5)   | C13             | C14  | N5               | 112.5(6)   |
| C8               | N2   | C7               | 112.2(5)   | N4              | C15  | C16              | 110.2(5)   |
| O10              | N3   | Fe1              | 160.1(6)   | N5              | C16  | C15              | 109.4(6)   |
| C2               | C1   | S1               | 109.7(4)   | N5              | C17  | C18              | 112.7(6)   |
| C1               | C2   | N1               | 112.2(5)   | C17             | C18  | S4               | 110.5(5)   |
| N1               | C3   | C4               | 113.3(6)   | F1              | B1   | F2               | 109.9(6)   |
| C3               | C4   | C5               | 114.6(6)   | F1              | B1   | F4               | 108.0(6)   |
| N2               | C5   | C4               | 112.7(6)   | F2              | B1   | F4               | 109.1(6)   |
| N1               | C6   | C7               | 110.4(6)   | F3              | B1   | F1               | 110.8(6)   |
| N2               | C7   | C6               | 110.4(5)   | F3              | B1   | F2               | 110.1(7)   |
| N2               | C8   | C9               | 113.3(5)   | F3              | B1   | F4               | 108.9(6)   |
| C8               | C9   | S2               | 108.9(4)   | F5              | B2   | F7               | 108.9(6)   |
| Fe2 <sup>2</sup> | Pt2  | Fe2              | 180.0      | F5              | B2   | F8               | 109.2(7)   |
| S3               | Pt2  | Fe2              | 48.97(5)   | F6              | B2   | F5               | 108.9(7)   |
| S3 <sup>2</sup>  | Pt2  | Fe2              | 131.03(5)  | F6              | B2   | F7               | 110.6(7)   |
| S3               | Pt2  | Fe2 <sup>2</sup> | 131.03(5)  | F6              | B2   | F8               | 109.3(6)   |
| S3 <sup>2</sup>  | Pt2  | Fe2 <sup>2</sup> | 48.97(5)   | F8              | B2   | F7               | 109.8(7)   |
| S3 <sup>2</sup>  | Pt2  | S3               | 180.0      | N1S             | C2S  | C3S              | 179.7(9)   |
| S3               | Pt2  | S4               | 82.36(6)   | N4S             | C5S  | C6S              | 179.7(9)   |

<sup>1</sup>1-X,-Y,-Z; <sup>2</sup>2-X,1-Y,1-Z

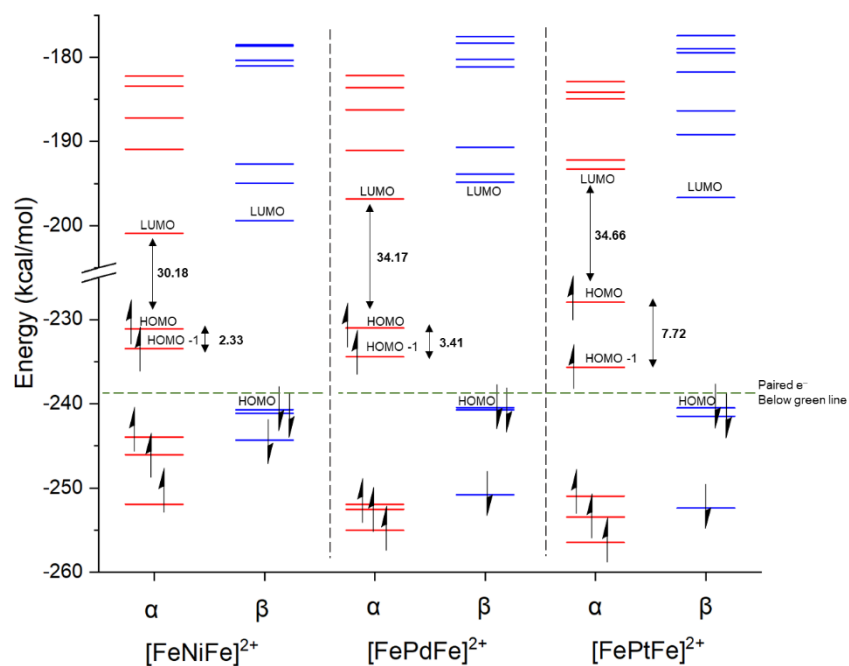

**Figure S20.** Alpha and Beta MO energy levels (HOMO to HOMO -4 and LUMO to LUMO +6) for the  $[\text{FeMFe}]^{2+}$  series in the triplet states.

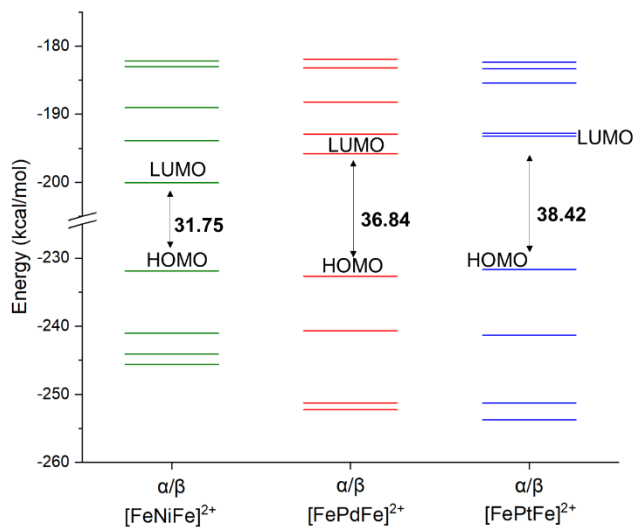

**Figure S21.** Alpha and Beta MO energy levels (HOMO to HOMO -3 and LUMO to LUMO +4) for the  $[\text{FeMFe}]^{2+}$  series in the BS singlet states.

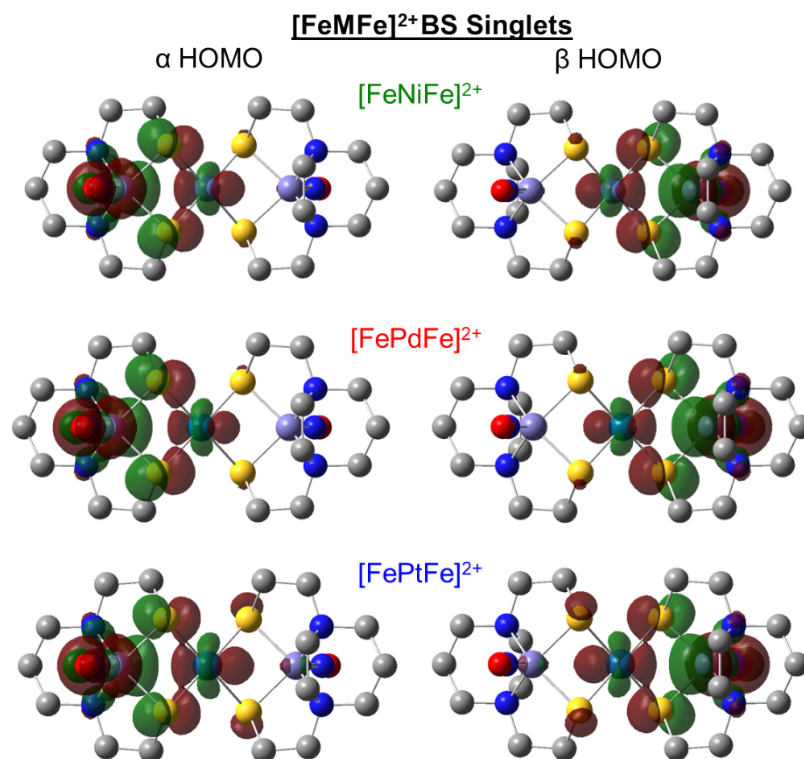

**Figure S22.** α HOMO and β HOMO-1 plots for the [FeMFe]<sup>2+</sup> series in the BS singlet states (isovalue = 0.03).

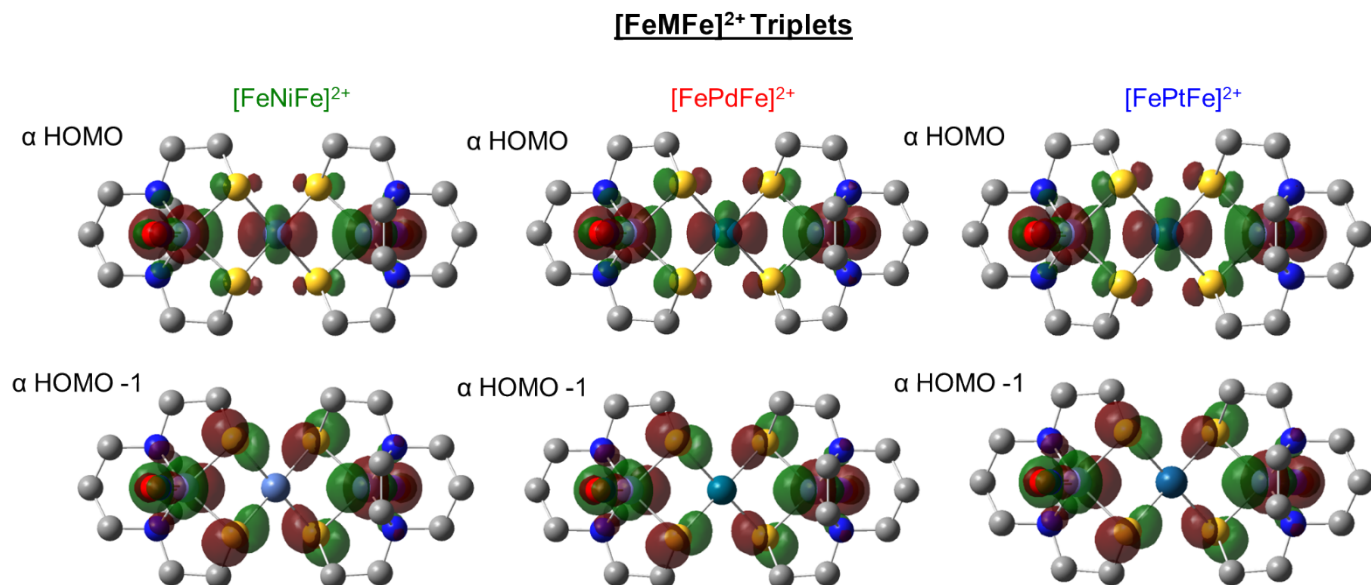

**Figure S23.** α HOMO and α HOMO-1 plots for the [FeMFe]<sup>2+</sup> series in the triplet states (isovalue = 0.03).

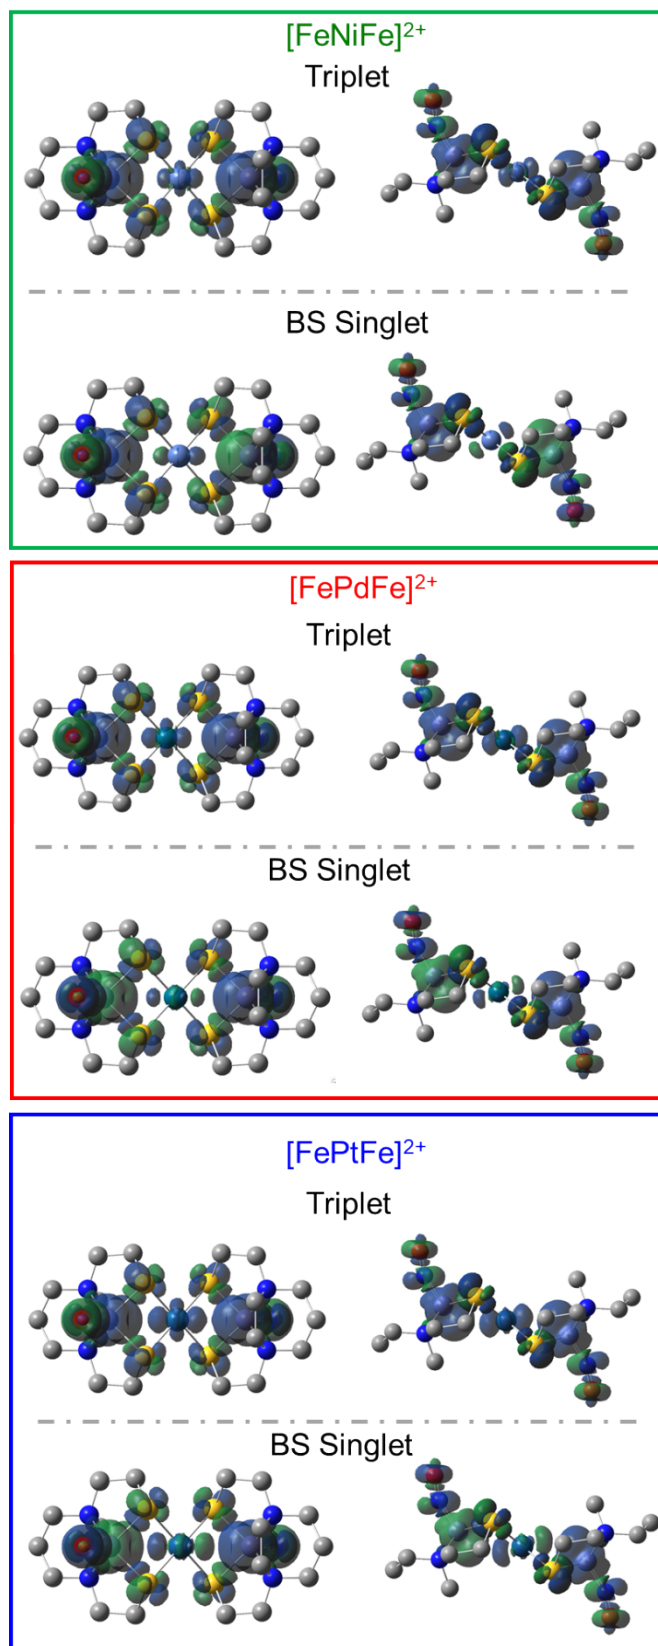

**Figure S24.** The two-view spin density plots of the **[FeMFe]<sup>2+</sup>** series for the triplet and BS singlet states (isovalue = 0.001).

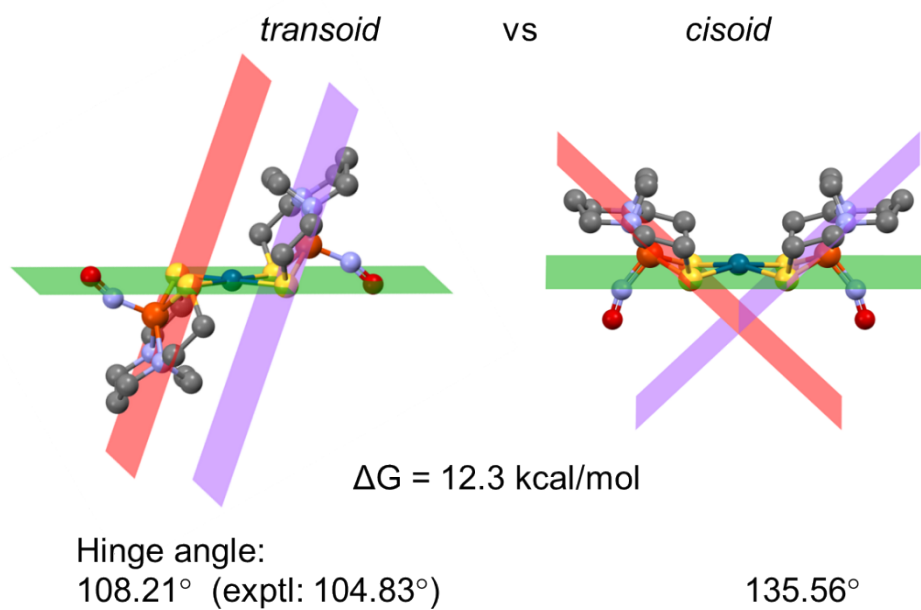

**Figure S25.** Comparison of the optimized *transoid*  $[\text{FePdFe}]^{2+}$  as isolated structure and the hypothetical optimized *cisoid*  $[\text{FePdFe}]^{2+}$  structure. The *transoid* structure is favored by 12.3 kcal/mol.



## Computational Coordinates (optimized BS singlet)

### [FeNiFe]<sup>2+</sup>

|    |             |             |             |
|----|-------------|-------------|-------------|
| Ni | 0.00000894  | 0.00001219  | -0.00000850 |
| Fe | 2.87501793  | 0.00009624  | 0.72361761  |
| S  | 1.23803215  | 1.48809299  | 1.08283466  |
| S  | 1.20576077  | -1.44996261 | 1.14791876  |
| N  | 3.64828627  | 1.26644845  | -0.63607947 |
| N  | 3.60084181  | -1.31966860 | -0.60483947 |
| O  | 4.82428867  | 0.09975608  | 2.79189175  |
| N  | 3.97752001  | 0.03167956  | 2.00117910  |
| C  | 3.08226331  | 0.74532949  | -1.92152067 |
| H  | 3.63536715  | 1.06094756  | -2.67959074 |
| H  | 2.16370657  | 1.09300121  | -2.04471899 |
| C  | 3.05359415  | -0.80830909 | -1.90952324 |
| H  | 2.12365204  | -1.12582525 | -2.02810839 |
| H  | 3.59776930  | -1.15786443 | -2.65894846 |
| C  | 3.15104460  | -2.71677425 | -0.31237200 |
| H  | 3.67694673  | -3.07024330 | 0.44823828  |
| H  | 3.34033780  | -3.28595289 | -1.10012393 |
| C  | 1.76513026  | 2.81921980  | -0.08224373 |
| H  | 1.25352088  | 2.74758307  | -0.92684833 |
| H  | 1.58175200  | 3.70636200  | 0.31695327  |
| C  | 5.14973354  | 1.22925753  | -0.67139690 |
| H  | 5.49660451  | 1.35226493  | 0.24760700  |
| H  | 5.47778380  | 1.98381209  | -1.22193132 |
| C  | 3.24035635  | 2.68121671  | -0.36510584 |
| H  | 3.47264464  | 3.24001705  | -1.14864430 |
| H  | 3.75131762  | 3.02140222  | 0.41156076  |
| C  | 5.10259495  | -1.33588175 | -0.63628138 |
| H  | 5.40605281  | -2.11477092 | -1.16667230 |
| H  | 5.44359164  | -1.44696312 | 0.28652234  |
| C  | 1.68066563  | -2.81644966 | 0.02121141  |
| H  | 1.49507351  | -3.68639646 | 0.45455855  |
| H  | 1.14596118  | -2.76429368 | -0.81035768 |
| C  | 5.69603068  | -0.06579953 | -1.23494401 |
| H  | 6.67527524  | -0.08103709 | -1.09480051 |
| H  | 5.53449932  | -0.07549620 | -2.21192342 |
| Fe | -2.87500005 | -0.00007186 | -0.72363461 |
| S  | -1.23801426 | -1.48806862 | -1.08285166 |
| S  | -1.20574289 | 1.44998698  | -1.14793577 |
| N  | -3.64831994 | -1.26649436 | 0.63611149  |
| N  | -3.60087548 | 1.31962270  | 0.60487150  |
| O  | -4.82432235 | -0.09980198 | -2.79185973 |
| N  | -3.97750214 | -0.03165518 | -2.00119611 |
| C  | -3.08229698 | -0.74537539 | 1.92155269  |
| H  | -3.63540082 | -1.06099346 | 2.67962276  |
| H  | -2.16374025 | -1.09304711 | 2.04475101  |
| C  | -3.05357628 | 0.80833346  | 1.90950624  |
| H  | -2.12368572 | 1.12577935  | 2.02814042  |
| H  | -3.59780297 | 1.15781852  | 2.65898048  |
| C  | -3.15107827 | 2.71672835  | 0.31244042  |
| H  | -3.67698041 | 3.07019740  | -0.44820626 |
| H  | -3.34037147 | 3.28590699  | 1.10015595  |
| C  | -1.76511238 | -2.81919543 | 0.08222673  |
| H  | -1.25350300 | -2.74755871 | 0.92683133  |
| H  | -1.58178567 | -3.70640790 | -0.31692124 |
| C  | -5.14976721 | -1.22930344 | 0.67142892  |
| H  | -5.49663817 | -1.35231083 | -0.24757498 |
| H  | -5.47781745 | -1.98385800 | 1.22196334  |
| C  | -3.24039002 | -2.68126261 | 0.36513786  |
| H  | -3.47267831 | -3.24006295 | 1.14867633  |
| H  | -3.75135129 | -3.02144812 | -0.41152873 |
| C  | -5.10257708 | 1.33590612  | 0.63626438  |
| H  | -5.40603493 | 2.11479530  | 1.16665530  |
| H  | -5.44362530 | 1.44691722  | -0.28649032 |
| C  | -1.68064775 | 2.81647403  | -0.02122841 |
| H  | -1.49505563 | 3.68642083  | -0.45457556 |
| H  | -1.14594330 | 2.76431804  | 0.81034068  |
| C  | -5.69601279 | 0.06582390  | 1.23492701  |
| H  | -6.67530889 | 0.08099119  | 1.09483254  |
| H  | -5.53453303 | 0.07545030  | 2.21195544  |

## Computational Coordinates (optimized BS singlet)

### [FePdFe]<sup>2+</sup>

|    |             |             |             |
|----|-------------|-------------|-------------|
| Pd | 0.00000389  | -0.00013310 | 0.00008123  |
| Fe | -3.01569945 | -0.00000760 | 0.68323720  |
| S  | -1.42061140 | 1.55110559  | 1.08719421  |
| S  | -1.42075105 | -1.55127325 | 1.08715852  |
| N  | -3.89697068 | 1.30748583  | -0.60661916 |
| O  | -4.04507091 | 0.00027223  | 3.29367784  |
| N  | -3.86543408 | 0.00012692  | 2.14031202  |
| N  | -3.89709007 | -1.30740592 | -0.60663875 |
| C  | -3.45923544 | 0.77832246  | -1.94989738 |
| H  | -2.44202433 | 1.13662669  | -2.12513925 |
| H  | -4.10516875 | 1.18678074  | -2.73780969 |
| C  | -1.94074838 | 2.83383489  | -0.16859934 |
| H  | -1.69477694 | 3.81715066  | 0.24290805  |
| H  | -1.36167892 | 2.68201550  | -1.08241540 |
| C  | -3.44314455 | 2.72870088  | -0.38421015 |
| H  | -3.97247956 | 3.07732693  | 0.50789852  |
| H  | -3.75975928 | 3.35012005  | -1.23513867 |
| C  | -3.44339449 | -2.72865958 | -0.38424390 |
| H  | -3.76005956 | -3.35003540 | -1.23518442 |
| H  | -3.97274443 | -3.07727269 | 0.50786631  |
| C  | -3.45931133 | -0.77825406 | -1.94990694 |
| H  | -4.10529452 | -1.18663497 | -2.73781746 |
| H  | -2.44213741 | -1.13665412 | -2.12517218 |
| C  | -5.40697448 | 1.28909960  | -0.49250364 |
| H  | -5.80362770 | 2.14263610  | -1.06035157 |
| H  | -5.63993360 | 1.43943702  | 0.56551269  |
| C  | -1.94100735 | -2.83392143 | -0.16866024 |
| H  | -1.36193193 | -2.68212382 | -1.08247748 |
| H  | -1.69512091 | -3.81726999 | 0.24281832  |
| C  | -5.40709053 | -1.28888219 | -0.49250521 |
| H  | -5.64006066 | -1.43919788 | 0.56551230  |
| H  | -5.80382953 | -2.14238122 | -1.06034981 |
| C  | -6.02670465 | 0.00013708  | -1.03226113 |
| H  | -7.09079125 | 0.00018272  | -0.76895288 |
| H  | -5.99384343 | 0.00013723  | -2.12856121 |
| Fe | 3.01566808  | -0.00004327 | -0.68324616 |
| S  | 1.42071519  | -1.55136942 | -1.08691183 |
| S  | 1.42054070  | 1.55100843  | -1.08727823 |
| N  | 3.89714720  | -1.30728101 | 0.60672672  |
| O  | 4.04488472  | -0.00055678 | -3.29374795 |
| N  | 3.86531652  | -0.00027997 | -2.14037139 |
| N  | 3.89700186  | 1.30761042  | 0.60640923  |
| C  | 3.45943670  | -0.77798887 | 1.94996219  |
| H  | 2.44227111  | -1.13637159 | 2.12530775  |
| H  | 4.10545543  | -1.18628254 | 2.73788975  |
| C  | 1.94105250  | -2.83388398 | 0.16901776  |
| H  | 1.69515608  | -3.81727788 | -0.24234779 |
| H  | 1.36202017  | -2.68200299 | 1.08284721  |
| C  | 3.44345069  | -2.72857065 | 0.38452832  |
| H  | 3.97276907  | -3.07725933 | -0.50756574 |
| H  | 3.76017725  | -3.34984757 | 1.23551909  |
| C  | 3.44314618  | 2.72878859  | 0.38385784  |
| H  | 3.75979734  | 3.35030726  | 1.23469921  |
| H  | 3.97240699  | 3.07734142  | -0.50832886 |
| C  | 3.45935874  | 0.77858763  | 1.94977256  |
| H  | 4.10535057  | 1.18713369  | 2.73759029  |
| H  | 2.44216060  | 1.13691004  | 2.12505552  |
| C  | 5.40714281  | -1.28875680 | 0.49251870  |
| H  | 5.80391685  | -2.14217909 | 1.06045388  |
| H  | 5.64005399  | -1.43920833 | -0.56549193 |
| C  | 1.94073513  | 2.83386739  | 0.16835019  |
| H  | 1.36172893  | 2.68212304  | 1.08222026  |
| H  | 1.69472098  | 3.81713861  | -0.24323663 |
| C  | 5.40699766  | 1.28922536  | 0.49218683  |
| H  | 5.63988852  | 1.43942826  | -0.56586410 |
| H  | 5.80368480  | 2.14283768  | 1.05989735  |
| C  | 6.02677598  | 0.00033848  | 1.03207066  |
| H  | 7.09084644  | 0.00036661  | 0.76869716  |
| H  | 5.99398229  | 0.00047667  | 2.12837263  |

Computational Coordinates (optimized BS singlet)

[FePtFe]<sup>2+</sup>

|    |             |             |             |
|----|-------------|-------------|-------------|
| Pt | -0.00001278 | -0.00000144 | 0.00000078  |
| Fe | -2.97527532 | -0.00000157 | 0.69092128  |
| S  | -1.38184875 | -1.55139714 | 1.12815207  |
| S  | -1.38184557 | 1.55139200  | 1.12815954  |
| O  | -4.06593135 | -0.00000959 | 3.27663483  |
| N  | -3.83162177 | -1.30694127 | -0.61473921 |
| N  | -3.83162000 | 1.30694806  | -0.61473148 |
| N  | -3.85512232 | -0.00001566 | 2.12841299  |
| C  | -5.34391148 | -1.28766095 | -0.53568530 |
| H  | -5.60149284 | -1.43556712 | 0.51703727  |
| H  | -5.72734014 | -2.14248705 | -1.11054153 |
| C  | -5.95053953 | 0.00000693  | -1.09174287 |
| H  | -7.02083978 | 0.00000690  | -0.85497243 |
| H  | -5.88991630 | 0.00001061  | -2.18679779 |
| C  | -5.34390973 | 1.28766925  | -0.53567491 |
| H  | -5.72733855 | 2.14250088  | -1.11052221 |
| H  | -5.60148787 | 1.43556413  | 0.51704986  |
| C  | -3.36071182 | -0.77849168 | -1.94719394 |
| H  | -3.98602423 | -1.18782053 | -2.75118927 |
| H  | -2.33770102 | -1.13319287 | -2.09386875 |
| C  | -1.89164552 | -2.84261234 | -0.12762933 |
| H  | -1.29231732 | -2.70069423 | -1.02966415 |
| H  | -1.66295388 | -3.82364228 | 0.29880682  |
| C  | -3.36071099 | 0.77850470  | -1.94718979 |
| H  | -2.33769961 | 1.13320509  | -2.09386130 |
| H  | -3.98602274 | 1.18783829  | -2.75118294 |
| C  | -1.89163911 | 2.84261212  | -0.12761955 |
| H  | -1.66294339 | 3.82363966  | 0.29882006  |
| H  | -1.29231299 | 2.70069512  | -1.02965570 |
| C  | -3.38808689 | -2.72838607 | -0.37659377 |
| H  | -3.68829638 | -3.35256777 | -1.23148492 |
| H  | -3.93932481 | -3.07129106 | 0.50446260  |
| C  | -3.38808161 | 2.72839219  | -0.37658223 |
| H  | -3.93931767 | 3.07129599  | 0.50447560  |
| H  | -3.68829002 | 3.35257597  | -1.23147203 |
| Fe | 2.97527264  | 0.00000258  | -0.69091972 |
| S  | 1.38184191  | 1.55139689  | -1.12811854 |
| S  | 1.38184008  | -1.55139239 | -1.12813216 |
| O  | 4.06587374  | 0.00003674  | -3.27665646 |
| N  | 3.83164052  | 1.30693884  | 0.61473168  |
| N  | 3.83164545  | -1.30694912 | 0.61471509  |
| N  | 3.85508816  | 0.00002642  | -2.12843021 |
| C  | 5.34392831  | 1.28766357  | 0.53564591  |
| H  | 5.60148686  | 1.43557517  | -0.51708146 |
| H  | 5.72736670  | 2.14248814  | 1.11049795  |
| C  | 5.95057155  | -0.00000552 | 1.09168502  |
| H  | 7.02086672  | -0.00000136 | 0.85489149  |
| H  | 5.88997213  | -0.00001327 | 2.18674131  |
| C  | 5.34393307  | -1.28766807 | 0.53562615  |
| H  | 5.72737596  | -2.14250039 | 1.11046311  |
| H  | 5.60148967  | -1.43555975 | -0.51710439 |
| C  | 3.36076040  | 0.77848387  | 1.94719463  |
| H  | 3.98608874  | 1.18781195  | 2.75117797  |
| H  | 2.33775243  | 1.13318247  | 2.09389317  |
| C  | 1.89164324  | 2.84259718  | 0.12767422  |
| H  | 1.29233492  | 2.70066018  | 1.02971939  |
| H  | 1.66293162  | 3.82363120  | -0.29874182 |
| C  | 3.36076462  | -0.77851177 | 1.94718597  |
| H  | 2.33775892  | -1.13321716 | 2.09388231  |
| H  | 3.98609689  | -1.18784541 | 2.75116297  |
| C  | 1.89164835  | -2.84260491 | 0.12764638  |
| H  | 1.66293604  | -3.82363459 | -0.29877917 |
| H  | 1.29234255  | -2.70067670 | 1.02969451  |
| C  | 3.38809174  | 2.72838244  | 0.37660407  |
| H  | 3.68831606  | 3.35256131  | 1.23149204  |
| H  | 3.93930708  | 3.07129659  | -0.50446284 |
| C  | 3.38809787  | -2.72839197 | 0.37657329  |
| H  | 3.93931108  | -3.07129541 | -0.50449897 |
| H  | 3.68832431  | -3.35257861 | 1.23145455  |

## References

- 1 C.-Y. Chiang, J. Lee, C. Dalrymple, M. C. Sarahan, J. H. Reibenspies and M. Y. Darensbourg, *Inorg. Chem.*, 2005, **44**, 9007–9016.
- 2 APEX4 “Program for Data Collection on Area Detectors” BRUKER AXS Inc., 5465 East Cheryl Parkway, Madison, WI 53711-5373 USA.
- 3 SADABS, Sheldrick, G.M. “Program for Absorption Correction of Area Detector Frames”, BRUKER AXS Inc., 5465 East Cheryl Parkway, Madison, WI 53711-5373 USA.
- 4 O. V. Dolomanov, L. J. Bourhis, R. J. Gildea, J. a. K. Howard and H. Puschmann, *J. Appl. Cryst.*, 2009, **42**, 339–341.
- 5 G. M. Sheldrick, *Acta Cryst A*, 2015, **71**, 3–8.
- 6 G. M. Sheldrick, *Acta Cryst C*, 2015, **71**, 3–8.
- 7 A. L. Spek, *J Appl Cryst*, 2003, **36**, 7–13.
- 8 G. A. Bain and J. F. Berry, *J. Chem. Educ.*, 2008, **85**, 532.
- 9 N. F. Chilton, R. P. Anderson, L. D. Turner, A. Soncini and K. S. Murray, *J. Comput. Chem.*, 2013, **34**, 1164–1175.
- 10 D. T. Petasis and M. P. Hendrich, in *Methods in Enzymology*, eds. P. Z. Qin and K. Warncke, Academic Press, 2015, vol. 563, pp. 171–208.
- 11 Abragam, A.; Bleaney, B. *Electron Paramagnetic Resonance of Transition Ions*. Oxford, **2012**; pp 1 - 944.
- 12 Gaussian 16, Revision C.01, Frisch, M. J.; Trucks, G. W.; Schlegel, H. B.; Scuseria, G. E.; Robb, M. A.; Cheeseman, J. R.; Scalmani, G.; Barone, V.; Petersson, G. A.; Nakatsuji, H.; Li, X.; Caricato, M.; Marenich, A. V.; Bloino, J.; Janesko, B. G.; Gomperts, R.; Mennucci, B.; Hratchian, H. P.; Ortiz, J. V.; Izmaylov, A. F.; Sonnenberg, J. L.; Williams-Young, D.; Ding, F.; Lipparini, F.; Egidi, F.; Goings, J.; Peng, B.; Petrone, A.; Henderson, T.; Ranasinghe, D.; Zakrzewski, V. G.; Gao, J.; Rega, N.; Zheng, G.; Liang, W.; Hada, M.; Ehara, M.; Toyota, K.; Fukuda, R.; Hasegawa, J.; Ishida, M.; Nakajima, T.; Honda, Y.; Kitao, O.; Nakai, H.; Vreven, T.; Throssell, K.; Montgomery, J. A., Jr.; Peralta, J. E.; Ogliaro, F.; Bearpark, M. J.; Heyd, J. J.; Brothers, E. N.; Kudin, K. N.; Staroverov, V. N.; Keith, T. A.; Kobayashi, R.; Normand, J.; Raghavachari, K.; Rendell, A. P.; Burant, J. C.; Iyengar, S. S.; Tomasi, J.; Cossi, M.; Millam, J. M.; Klene, M.; Adamo, C.; Cammi, R.; Ochterski, J. W.; Martin, R. L.; Morokuma, K.; Farkas, O.; Foresman, J. B.; Fox, D. J. Gaussian, Inc., Wallingford CT, **2016**.
- 13 J. Tao, J. P. Perdew, V. N. Staroverov and G. E. Scuseria, *Phys. Rev. Lett.*, 2003, **91**, 146401.
- 14 R. Krishnan, J. S. Binkley, R. Seeger and J. A. Pople, *The Journal of Chemical Physics*, 1980, **72**, 650–654.
- 15 A. D. McLean and G. S. Chandler, *The Journal of Chemical Physics*, 1980, **72**, 5639–5648.
- 16 T. Clark, J. Chandrasekhar, G. W. Spitznagel and P. V. R. Schleyer, *Journal of Computational Chemistry*, 1983, **4**, 294–301.
- 17 A. J. H. Wachters, *The Journal of Chemical Physics*, 1970, **52**, 1033–1036.
- 18 P. J. Hay, *J. Chem. Phys.*, 1977, **66**, 4377–4384.
- 19 K. Raghavachari and G. W. Trucks, *The Journal of Chemical Physics*, 1989, **91**, 1062–1065.
- 20 N. B. Balabanov and K. A. Peterson, *J. Chem. Phys.*, 2005, **123**, 064107.
- 21 K. A. Peterson, D. Figgen, M. Dolg and H. Stoll, *The Journal of Chemical Physics*, 2007, **126**, 124101.
- 22 D. Figgen, K. A. Peterson, M. Dolg and H. Stoll, *J. Chem. Phys.*, 2009, **130**, 164108.
- 23 GaussView, Version 6, Dennington, Roy; Keith, Todd A.; Millam, John M. Semichem Inc., Shawnee Mission, KS, **2016**.
